# Supplementary material for: The Dynamics of Autism Spectrum Disorders: How Neurotoxic Compounds and Neurotransmitters Interact
Source: PubMed Central journal article supplement (PMC3774444; doi:10.3390/ijerph10083384), 2013-08-06
Supplement: ijerph-10-03384-s001.pdf [file ijerph-10-03384-s001.pdf]

## The Dynamics of Autism Spectrum Disorders: How Neurotoxic Compounds and Neurotransmitters Interact

---

### Abbreviations

|                  |                         |                  |                                        |           |                                        |
|------------------|-------------------------|------------------|----------------------------------------|-----------|----------------------------------------|
| 5-HT             | Serotonin               | DBP              | Dibutyl phthalate                      | LSS       | Liquid scintillation spectrophotometer |
| A(number)        | Aroclor(number)         | DCHP             | Dibutyl phthalate                      | MID       | Midbrain                               |
| B <sub>max</sub> | Total density receptors | DDD              | Dichlorodiphenyldichloroethane         | MO        | Medulla oblongata                      |
| BS               | Brainstem               | DDE              | Dichlorodiphenyldichloroethylene       | NACC      | Nucleus accumbens                      |
| CRBL             | Cerebellum              | DDT              | Dichlorodiphenyltrichloroethane        | NMR       | Nuclear magnetic resonance             |
| CS               | Corpus striatum         | DEHP             | Di(2-ethylhexyl) phthalate             | Ortho-TCB | 2,4,2',4'-Tetrachlorobiphenyl          |
| CTX              | Cortex                  | DS               | Dorsal striatum                        | PCB       | Polychlorinated biphenyl               |
| C-               | Cerebral                | dpf              | Days post-fertilization                | PND       | Post-natal day                         |
| CG-              | Cingulate               | DTG              | Dentate gyrus                          | PtCB      | 3,4,5,3',4'-Pentachlorobiphenyl        |
| F-               | Frontal                 | ELISA            | Enzyme-Linked Immuno Sorbent Assay     | RAR       | Receptor autoradiography               |
| M-               | Motor                   | FB               | Forebrain                              | RT-PCR    | Real-time polymerase chain reaction    |
| O-               | Occipital               | HIP              | Hippocampus                            | SERT      | Serotonin transporter                  |
| PA-              | Parietal                | HPLC             | High Performance Liquid Chromatography | SN        | Substantia nigra                       |
| PF-              | Prefrontal              | HTH              | Hypothalamus                           | TCE       | Trichloroethylene                      |
| TEM-             | Temporal                | IHC              | Immunohistochemistry                   | TH        | Tyrosine Hydroxylase                   |
| DA               | Dopamine                | KCl              | Potassium chloride                     | TLCPH     | Telencephalon                          |
| DAT              | Dopamine Transporter    | K <sub>m</sub>   | Affinity substrate enzyme              | TOA       | Time of analysis                       |
| VM               | Ventral mesencephalon   | V <sub>max</sub> | Maximal initial velocity               | WB        | Western blot                           |
|                  |                         |                  |                                        | wpf       | Weeks post-fertilization               |

**Table S1.** Literature overview organochlorines and neurotransmitters, classified by neurotransmitters. Data is presented in the following order: GABA, Glu 5-HT, DA.

| Source                                                                                                                                                                                                                                                                                                                                                                                                                                                                                                                                                                                                                                                                                                | Method              |                               |                                                            |                        |                   |                                                |                                                        | Outcome                                                                                                                                                                                                                                   |
|-------------------------------------------------------------------------------------------------------------------------------------------------------------------------------------------------------------------------------------------------------------------------------------------------------------------------------------------------------------------------------------------------------------------------------------------------------------------------------------------------------------------------------------------------------------------------------------------------------------------------------------------------------------------------------------------------------|---------------------|-------------------------------|------------------------------------------------------------|------------------------|-------------------|------------------------------------------------|--------------------------------------------------------|-------------------------------------------------------------------------------------------------------------------------------------------------------------------------------------------------------------------------------------------|
|                                                                                                                                                                                                                                                                                                                                                                                                                                                                                                                                                                                                                                                                                                       | Experimental group  | N                             | Exposure                                                   |                        |                   | Analysis                                       |                                                        |                                                                                                                                                                                                                                           |
|                                                                                                                                                                                                                                                                                                                                                                                                                                                                                                                                                                                                                                                                                                       |                     |                               | Compound                                                   | Dose                   | Time point/Length | Location/technique                             | Time                                                   |                                                                                                                                                                                                                                           |
| <b>GABA</b><br>Elnar, A. A.<br><i>et al.</i> , 2012 [1]                                                                                                                                                                                                                                                                                                                                                                                                                                                                                                                                                                                                                                               | Swiss albino mice   | N = 10 per treatment group    | Mixture of PCB28, PCB52, PCB101, PCB138, PCB153 and PCB180 | 1, 10 or 100 ng/kg/day | PND0-21           | RT-PCR                                         | PND0-275 (several time points)                         | GABA level, gene expression GABA <sub>Aα1</sub> receptor and 5-HT1A receptor                                                                                                                                                              |
| <b>Result:</b> No significant results                                                                                                                                                                                                                                                                                                                                                                                                                                                                                                                                                                                                                                                                 |                     |                               |                                                            |                        |                   |                                                |                                                        |                                                                                                                                                                                                                                           |
| Dickerson, S.M.<br><i>et al.</i> , 2011 [2]                                                                                                                                                                                                                                                                                                                                                                                                                                                                                                                                                                                                                                                           | Sprague-Dawley rats | N = 10–12 per treatment group | A1221 or mixture of PCB138, PCB153 and PCB180              | 1 mg/kg                | GD16 and GD18     | Taqman low-density arrays                      | PND1                                                   | Gene expression GABA <sub>B</sub> receptors 1 and 2, Glu receptors <i>gria</i> , <i>gria2</i> , <i>gria3</i> , <i>grin2a</i> , <i>grin2b</i> , <i>grin2c</i> , <i>grin2d</i> , vesicular Glu transporters <i>Slc17a1</i> , <i>Slc17a6</i> |
| <b>Result:</b> Sign. downregulation of GABA <sub>B</sub> receptor 1 (GABBR1, $p = 0.028$ ), Glu receptors <i>gria2</i> ( $p = 0.042$ ) and <i>grin2a</i> ( $p = 0.033$ ) and vesicular Glu transporter <i>Slc17a1</i> ( $p = 0.006$ ) in males after exposure to PCBs<br>Sign. increase of GABA <sub>B</sub> receptor 2 (GABBR2) in males after exposure to PCBs ( $p < 0.001$ )<br>Sign. increase of GABA <sub>B</sub> receptor 1 (GABBR1, $p < 0.001$ ) and Glu receptors <i>grin2b</i> ( $p < 0.001$ ) in females after exposure to A1221<br>Sign. increase of GABA <sub>B</sub> receptor 1 (GABBR1, $p < 0.004$ ) and Glu receptor <i>grin2c</i> ( $p = 0.03$ ) in females after exposure to PCBs |                     |                               |                                                            |                        |                   |                                                |                                                        |                                                                                                                                                                                                                                           |
| Boix, J. <i>et al.</i> , 2010 [3]                                                                                                                                                                                                                                                                                                                                                                                                                                                                                                                                                                                                                                                                     | Wistar rats         | N = 14–33 per treatment group | PCB52, PCB138 or PCB180                                    | 1 mg/kg/day            | GD7-PND21         | In CRBL using microdialysis ( <i>in vivo</i> ) | Males 3 months post-natal, females 4 months post-natal | GABA level, Glu level                                                                                                                                                                                                                     |
| <b>Result:</b> Sign. increase of GABA level in males and females after exposure to PCB52 ( $p < 0.001$ )<br>Sign. increase of Glu level in males after exposure to PCB52 ( $p < 0.001$ )<br>Sign. decrease of Glu level in females after exposure to PCB52 ( $p < 0.001$ ), PCB138 ( $p < 0.05$ ) and PCB180 ( $p < 0.01$ )                                                                                                                                                                                                                                                                                                                                                                           |                     |                               |                                                            |                        |                   |                                                |                                                        |                                                                                                                                                                                                                                           |
| Martyniuk, C.J.<br><i>et al.</i> , 2010 [4]                                                                                                                                                                                                                                                                                                                                                                                                                                                                                                                                                                                                                                                           | Largemouth bass     | Not reported                  | Dieldrin                                                   | 10 mg/kg               | Single dose       | In HIP, TLCPH and CRBL using HPLC              | 7 days after exposure                                  | GABA level, DA level                                                                                                                                                                                                                      |
| <b>Result:</b> Sign. increase of GABA level in females in CRBL and HIP after exposure to dieldrin ( $p \leq 0.05$ )                                                                                                                                                                                                                                                                                                                                                                                                                                                                                                                                                                                   |                     |                               |                                                            |                        |                   |                                                |                                                        |                                                                                                                                                                                                                                           |

Table S1. Cont.

| Source                                 | Method                                                                                                                                                                                                                                                                                                                                                                                                                                                                                                                                                                                                                                                                                                                                                                                                                                                                                                                                                                                                                                                                                                                                                                                         |                            |                                  |                            |                           |                                                    |                                                                 | Outcome                                                                 |
|----------------------------------------|------------------------------------------------------------------------------------------------------------------------------------------------------------------------------------------------------------------------------------------------------------------------------------------------------------------------------------------------------------------------------------------------------------------------------------------------------------------------------------------------------------------------------------------------------------------------------------------------------------------------------------------------------------------------------------------------------------------------------------------------------------------------------------------------------------------------------------------------------------------------------------------------------------------------------------------------------------------------------------------------------------------------------------------------------------------------------------------------------------------------------------------------------------------------------------------------|----------------------------|----------------------------------|----------------------------|---------------------------|----------------------------------------------------|-----------------------------------------------------------------|-------------------------------------------------------------------------|
|                                        | Experimental group                                                                                                                                                                                                                                                                                                                                                                                                                                                                                                                                                                                                                                                                                                                                                                                                                                                                                                                                                                                                                                                                                                                                                                             | N                          | Exposure                         |                            |                           | Analysis                                           |                                                                 |                                                                         |
|                                        |                                                                                                                                                                                                                                                                                                                                                                                                                                                                                                                                                                                                                                                                                                                                                                                                                                                                                                                                                                                                                                                                                                                                                                                                |                            | Compound                         | Dose                       | Time point/Length         | Location/technique                                 | Time                                                            |                                                                         |
|                                        | Male Sprague-Dawley rats                                                                                                                                                                                                                                                                                                                                                                                                                                                                                                                                                                                                                                                                                                                                                                                                                                                                                                                                                                                                                                                                                                                                                                       | N = 10 per treatment group | Endosulfan                       | 0.61 or 6.12 mg/kg day     | Gestation-weaning (PND21) | In PF-CTX using HPLC                               | PND15, 30, 60                                                   | GABA level, Glu level, DA level, DA turnover, 5-HT level, 5-HT turnover |
| Cabaleiro, T. <i>et al.</i> , 2008 [5] | <p><b>Result:</b> Sign. increase at PND15 of Glu level (<math>p \leq 0.01</math>) after exposure to 6.12 mg/kg/day of endosulfan</p> <p>Sign. decrease of DA turnover (DOPAC/DA) at PND15 after exposure to 0.61 mg/kg/day and 6.12 mg/kg/day of endosulfan (<math>p \leq 0.001</math> all)</p> <p>Sign. increase at PND30 of Glu level (<math>p \leq 0.05</math>) and 5-HT level (<math>p \leq 0.001</math>) after exposure to 0.61 mg/kg/day of endosulfan</p> <p>Sign. increase at PND30 of GABA level (<math>p \leq 0.01</math>), Glu level (<math>p \leq 0.01</math>) and 5-HT level (<math>p \leq 0.01</math>) after exposure to 6.12 mg/kg/day of endosulfan</p> <p>Sign. decrease at PND60 of GABA level (<math>p \leq 0.01</math>) and DA turnover (DOPAC/DA, <math>p \leq 0.05</math>) after exposure to 0.61 mg/kg/day of endosulfan</p> <p>Sign. decrease at PND60 of GABA level (<math>p \leq 0.01</math>), DA turnover (DOPAC/DA, <math>p \leq 0.05</math>) and 5-HT turnover (5-HIAA/5-HT, <math>p \leq 0.05</math>) after exposure to 6.12 mg/kg/day of endosulfan</p> <p>Sign. increase of 5-HT level at PND60 after exposure 6.12 mg/(kg day) (<math>p \leq 0.05</math>)</p> |                            |                                  |                            |                           |                                                    |                                                                 |                                                                         |
| Babot, Z. <i>et al.</i> , 2007 [6]     | Cerebellar granule cells of NRMI mice (7-days old)                                                                                                                                                                                                                                                                                                                                                                                                                                                                                                                                                                                                                                                                                                                                                                                                                                                                                                                                                                                                                                                                                                                                             | Not reported               | Dieldrin                         | 3 $\mu$ M                  | 6–7 days                  | HPLC-F, saturation binding studies                 | Not reported                                                    | GABA level, Glu level, binding NMDA receptor                            |
|                                        | <p><b>Result:</b> Sign. decrease of <math>B_{max}</math> of NMDA receptor after exposure to dieldrin (<math>p &lt; 0.05</math>)</p>                                                                                                                                                                                                                                                                                                                                                                                                                                                                                                                                                                                                                                                                                                                                                                                                                                                                                                                                                                                                                                                            |                            |                                  |                            |                           |                                                    |                                                                 |                                                                         |
| Lafuente, A. <i>et al.</i> , 2007 [7]  | Adult male Sprague-Dawley rats                                                                                                                                                                                                                                                                                                                                                                                                                                                                                                                                                                                                                                                                                                                                                                                                                                                                                                                                                                                                                                                                                                                                                                 | N = 10 per treatment group | Methoxychlor                     | 25 mg/kg/day               | 1 month                   | In striatum using HPLC                             | Immediate freezing of striatum after exposure, TOA not reported | GABA level, Glu level, DA level, 5-HT level                             |
|                                        | <p><b>Result:</b> Sign. increase of Glu level after exposure to Methoxychlor (<math>p \leq 0.05</math>)</p> <p>Sign. increase of GABA level after exposure to Methoxychlor (<math>p \leq 0.001</math>)</p>                                                                                                                                                                                                                                                                                                                                                                                                                                                                                                                                                                                                                                                                                                                                                                                                                                                                                                                                                                                     |                            |                                  |                            |                           |                                                    |                                                                 |                                                                         |
| <b>GLUTAMATE</b>                       | Mature Eisenia fetida earth-worms                                                                                                                                                                                                                                                                                                                                                                                                                                                                                                                                                                                                                                                                                                                                                                                                                                                                                                                                                                                                                                                                                                                                                              | N = 20 per treatment group | Endosulfan or Endosulfan sulfate | 0.1, 1.0 or 10.0 mg/kg/day | 7 days                    | In coelomic fluid and tissues using NMR techniques | 11 days after onset exposure                                    | Glu level                                                               |
| Yuk, J. <i>et al.</i> , 2013 [8]       | <p><b>Result:</b> Sign. increase of Glu level in after exposure to 0.1, 1.0 or 10.0 mg/kg/day of endosulfan (<math>p &lt; 0.05</math> all)</p> <p>Sign. increase of Glu level in after exposure to 0.1 or 10.0 mg/kg/day of endosulfan sulfate (<math>p &lt; 0.05</math> all)</p>                                                                                                                                                                                                                                                                                                                                                                                                                                                                                                                                                                                                                                                                                                                                                                                                                                                                                                              |                            |                                  |                            |                           |                                                    |                                                                 |                                                                         |

Table S1. Cont.

| Source                                                                                                                                                                                                                                                                                                                                                                                                                                                                                                                                                                                                                                                                                                          | Method                 |                               |                         |                               |                                      |                                                                |                                                                 | Outcome                                                                         |
|-----------------------------------------------------------------------------------------------------------------------------------------------------------------------------------------------------------------------------------------------------------------------------------------------------------------------------------------------------------------------------------------------------------------------------------------------------------------------------------------------------------------------------------------------------------------------------------------------------------------------------------------------------------------------------------------------------------------|------------------------|-------------------------------|-------------------------|-------------------------------|--------------------------------------|----------------------------------------------------------------|-----------------------------------------------------------------|---------------------------------------------------------------------------------|
|                                                                                                                                                                                                                                                                                                                                                                                                                                                                                                                                                                                                                                                                                                                 | Experimental group     | N                             | Exposure                |                               |                                      | Analysis                                                       |                                                                 |                                                                                 |
|                                                                                                                                                                                                                                                                                                                                                                                                                                                                                                                                                                                                                                                                                                                 |                        |                               | Compound                | Dose                          | Time point/Length                    | Location/technique                                             | Time                                                            |                                                                                 |
| Hilgier, W. <i>et al.</i> , 2012 [9]                                                                                                                                                                                                                                                                                                                                                                                                                                                                                                                                                                                                                                                                            | Adult male Wistar rats | N = 4                         | A1254                   | 10 mg/kg/day                  | 14 days                              | Basal and HIP microdialysis, HPLC                              | Every 40 min in a period of 40–240 min after exposure           | Glu level                                                                       |
| <b>Result:</b> Sign. decrease (63%) after 160 min of HIP Glu level after exposure to A1254 ( $p < 0.05$ )                                                                                                                                                                                                                                                                                                                                                                                                                                                                                                                                                                                                       |                        |                               |                         |                               |                                      |                                                                |                                                                 |                                                                                 |
| Strużyńska, L. <i>et al.</i> , 2012 [10]                                                                                                                                                                                                                                                                                                                                                                                                                                                                                                                                                                                                                                                                        | Adult male Wistar rats | N = 3–5 per treatment group   | A1254                   | 10 mg/kg/day                  | 14 days                              | In CRBL and FB using WB, RT-PCR, saturation binding techniques | Immediate freezing of striatum after exposure, TOA not reported | (Gene) Expression Glu transporters EAAC1, GLT-1, GLAST, Glu uptake, Glu release |
| <b>Result:</b> Sign. increase of synaptosomal Na <sup>+</sup> -dependent [3H] Glu uptake 4 and 6 minutes after addition of [3H]-Glu ( $p < 0.05$ )<br>Sign. increase of synaptosomal KCl-dependent [3H] Glu uptake ( $p < 0.05$ )<br>Sign. decrease of Na <sup>+</sup> -dependent [3H] Glu uptake in astroglial fractions of glial plasmalemmal vesicles 4, 6 and 8 minutes after addition of [3H]-Glu in the A1254 exposure group ( $p < 0.05$ )<br>Sign. increase of Glu transporter EAAC1 mRNA expression in FB ( $p < 0.05$ )<br>Sign. decrease of Glu transporter EAAC1 mRNA expression in CRBL ( $p < 0.05$ )<br>Sign. decrease of Glu transporter GLT-1 mRNA expression in CRBL and FB ( $p < 0.05$ all) |                        |                               |                         |                               |                                      |                                                                |                                                                 |                                                                                 |
| Boix, J. <i>et al.</i> , 2011 [11]                                                                                                                                                                                                                                                                                                                                                                                                                                                                                                                                                                                                                                                                              | Wistar rats            | N = 12–23 per treatment group | PCB52, PCB138 or PCB180 | 1 mg/kg/day                   | GD7-PND21                            | In NACC using microdialysis and HPLC                           | 4 months of age                                                 | Glu level, DA level                                                             |
| <b>Result:</b> Sign. decrease of extracellular Glu in male rats level after exposure to PCB52 ( $p < 0.01$ ), PCB138 ( $p < 0.01$ ) or PCB180 ( $p < 0.05$ )<br>Sign. decrease of extracellular Glu level in female rats after exposure to PCB52 ( $p < 0.01$ ), PCB138 ( $p < 0.05$ ) or PCB180 ( $p < 0.05$ )<br>Sign. increase of extracellular DA level in both male and female rats after exposure to PCB180 ( $p < 0.05$ )                                                                                                                                                                                                                                                                                |                        |                               |                         |                               |                                      |                                                                |                                                                 |                                                                                 |
| Stavenes, A. I. <i>et al.</i> , 2009 [12]                                                                                                                                                                                                                                                                                                                                                                                                                                                                                                                                                                                                                                                                       | Male Wistar rats       | Not reported                  | A1254 or PCB153         | 0.6–1.2 µL in 510 µL solution | 15 min preincubation, 3 min exposure | In synaptosomes using LSS after filtration                     | Immediately                                                     | Glu uptake                                                                      |
| <b>Result:</b> Sign. inhibition of Glu uptake in a dose-dependent manner after exposure to A1254 and PCB153 ( $p < 0.0001$ all)                                                                                                                                                                                                                                                                                                                                                                                                                                                                                                                                                                                 |                        |                               |                         |                               |                                      |                                                                |                                                                 |                                                                                 |

Table S1. Cont.

| Source                                                                                                                                                                                                                                                                                                                                                                                                                                                                                                                                                                                                                           | Method                         |                                           |              |                       |                   |                                                                                    |                                                              | Outcome                                          |
|----------------------------------------------------------------------------------------------------------------------------------------------------------------------------------------------------------------------------------------------------------------------------------------------------------------------------------------------------------------------------------------------------------------------------------------------------------------------------------------------------------------------------------------------------------------------------------------------------------------------------------|--------------------------------|-------------------------------------------|--------------|-----------------------|-------------------|------------------------------------------------------------------------------------|--------------------------------------------------------------|--------------------------------------------------|
|                                                                                                                                                                                                                                                                                                                                                                                                                                                                                                                                                                                                                                  | Experimental group             | N                                         | Exposure     |                       |                   | Analysis                                                                           |                                                              |                                                  |
|                                                                                                                                                                                                                                                                                                                                                                                                                                                                                                                                                                                                                                  |                                |                                           | Compound     | Dose                  | Time point/Length | Location/technique                                                                 | Time                                                         |                                                  |
| 5-HT<br>Honma, T. <i>et al.</i> ,<br>2009 [13]                                                                                                                                                                                                                                                                                                                                                                                                                                                                                                                                                                                   | Sprague-Dawley rats            | N= 5–8 per treatment group                | PCB153       | 16 or 64 mg/kg/day    | GD10-16           | In whole brain, FB, HB, F-CTX, O-CTX, HIP, MID, MO, striatum, CRBL, HTH using HPLC | Age of 1, 3, 6 or 9 weeks, or 1 year, dams day of weaning    | 5-HT level, 5-HT turnover, DA level, DA turnover |
| <p><b>Result:</b> Sign. increase of DA level in whole brain in rats after exposure to 16 mg/kg/day after 1 week (<math>p &lt; 0.05</math>)</p> <p>Sign. increase of 5-HT level in whole brain in rats after exposure to 64 mg/kg/day after 1 week (<math>p &lt; 0.05</math>)</p> <p>Sign. decrease of DA turnover in FB and HB and of 5-HT turnover in HB in rats after exposure to 64 mg/kg/day after 9 weeks (<math>p &lt; 0.05</math> all)</p> <p>Sign. decrease of DA level in O-CTX and HIP in dams after exposure to 16 mg/kg/day; and in O-CTX, HIP, MO after exposure to 64 mg/kg/day (<math>p &lt; 0.05</math> all)</p> |                                |                                           |              |                       |                   |                                                                                    |                                                              |                                                  |
| Lafuente, A. <i>et al.</i> , 2008 [14]                                                                                                                                                                                                                                                                                                                                                                                                                                                                                                                                                                                           | Adult male Sprague-Dawley rats | N = 10 per treatment group                | Methoxychlor | 25 mg/kg/day          | 1 month           | In HTH using HPLC                                                                  | Immediate freezing of brain after exposure, TOA not reported | 5-HT level, 5-HT turnover                        |
| <p><b>Result:</b> Sign. increase of 5-HT level in the anterior HTH after exposure to Methoxychlor (<math>p \leq 0.05</math>)</p> <p>Sign. decrease of 5-HT level in the anterior and posterior HTH after exposure to Methoxychlor (<math>p \leq 0.05</math> all)</p>                                                                                                                                                                                                                                                                                                                                                             |                                |                                           |              |                       |                   |                                                                                    |                                                              |                                                  |
| Castoldi, A.F., 2006 [15]                                                                                                                                                                                                                                                                                                                                                                                                                                                                                                                                                                                                        | Sprague-Dawley rats            | N = 8–13 per treatment group (per gender) | PCB153       | 20 mg/kg/day          | GD10-16           | In C-CTX, CRBL HIP, striatum using HPLC                                            | PND21                                                        | 5-HT level, DA level                             |
| <p><b>Result:</b> Sign. decrease of DA level in striatum in both male and female rats (<math>p &lt; 0.05</math>)</p> <p>Sign. decrease of 5-HT level in C-CTX in both male and female rats (<math>p &lt; 0.05</math>)</p>                                                                                                                                                                                                                                                                                                                                                                                                        |                                |                                           |              |                       |                   |                                                                                    |                                                              |                                                  |
| Khan, I.A. <i>et al.</i> , 2004 [16]                                                                                                                                                                                                                                                                                                                                                                                                                                                                                                                                                                                             | Male Sprague-Dawley rats       | N = 8–9 per treatment group               | A1254        | 0.33 mg/g body weight | Single dose       | In BS and F-CTX using HPLC                                                         | Freezing of brain 7 days after exposure, TOA not reported    | 5-HT level                                       |
| <p><b>Result:</b> Sign. decrease of 5-HT concentration in F-CTX after exposure to A1254 (<math>p &lt; 0.05</math>)</p>                                                                                                                                                                                                                                                                                                                                                                                                                                                                                                           |                                |                                           |              |                       |                   |                                                                                    |                                                              |                                                  |

Table S1. Cont.

| Source                                                                                                                                                                                                                                                                                                                                                                                                                                                                                                                                                                                                                                                                                                                                                                                                                                                                                                                                                                                                                                                                                                                                                                             | Method              |                                    |                                          |                       |                                         |                                                                                                                 |                                                              | Outcome                                                                                                  |
|------------------------------------------------------------------------------------------------------------------------------------------------------------------------------------------------------------------------------------------------------------------------------------------------------------------------------------------------------------------------------------------------------------------------------------------------------------------------------------------------------------------------------------------------------------------------------------------------------------------------------------------------------------------------------------------------------------------------------------------------------------------------------------------------------------------------------------------------------------------------------------------------------------------------------------------------------------------------------------------------------------------------------------------------------------------------------------------------------------------------------------------------------------------------------------|---------------------|------------------------------------|------------------------------------------|-----------------------|-----------------------------------------|-----------------------------------------------------------------------------------------------------------------|--------------------------------------------------------------|----------------------------------------------------------------------------------------------------------|
|                                                                                                                                                                                                                                                                                                                                                                                                                                                                                                                                                                                                                                                                                                                                                                                                                                                                                                                                                                                                                                                                                                                                                                                    | Experimental group  | N                                  | Exposure                                 |                       |                                         | Analysis                                                                                                        |                                                              |                                                                                                          |
|                                                                                                                                                                                                                                                                                                                                                                                                                                                                                                                                                                                                                                                                                                                                                                                                                                                                                                                                                                                                                                                                                                                                                                                    |                     |                                    | Compound                                 | Dose                  | Time point/Length                       | Location/technique                                                                                              | Time                                                         |                                                                                                          |
| DA<br>Lee, D.W. <i>et al.</i> ,<br>2012 [17]                                                                                                                                                                                                                                                                                                                                                                                                                                                                                                                                                                                                                                                                                                                                                                                                                                                                                                                                                                                                                                                                                                                                       | Male C57BL/6J mice  | N = 20 per treatment group         | A1254                                    | 6, 12 or 25 mg/kg/day | 4 weeks                                 | In striatum using HPLC, IHC                                                                                     | 2 weeks after exposure                                       | DA level, DA transporter (DAT) level, DA turnover                                                        |
| <p><b>Result:</b> Sign. increase of DA level after exposure to 6 mg/kg/day (<math>p &lt; 0.001</math>), 12 mg/kg/day (<math>p &lt; 0.001</math>) and 25 mg/kg/day (<math>p &lt; 0.05</math>)<br/>Sign. decrease of DAT level after exposure to 6 mg/kg/day (<math>p &lt; 0.05</math>), 12 mg/kg/day (<math>p &lt; 0.01</math>) and 25 mg/kg/day (<math>p &lt; 0.001</math>)</p>                                                                                                                                                                                                                                                                                                                                                                                                                                                                                                                                                                                                                                                                                                                                                                                                    |                     |                                    |                                          |                       |                                         |                                                                                                                 |                                                              |                                                                                                          |
| Coccini, T. <i>et al.</i> ,<br>2011 [18]                                                                                                                                                                                                                                                                                                                                                                                                                                                                                                                                                                                                                                                                                                                                                                                                                                                                                                                                                                                                                                                                                                                                           | Sprague-Dawley rats | N = 2–4 per treatment group        | PCB153                                   | 5 mg/kg/day           | GD7-PND21                               | In C-CTX and striatum using saturation binding techniques                                                       | PND21 or 36                                                  | Density and affinity of DA receptors D <sub>1</sub> and D <sub>2</sub>                                   |
| <p><b>Result:</b> Sign. decrease at PND21 of D<sub>1</sub> density in the striatum and C-CTX in male rats (<math>p &lt; 0.05</math> all)<br/>Sign. increase of D<sub>2</sub> density in the cortex at PND21 in male rats and at PND36 in male and female rats (<math>p &lt; 0.05</math> all)<br/>Sign. decrease of D<sub>2</sub> affinity in the cerebral cortex at PND21 in male rats and at PND36 in male and female rats (<math>p &lt; 0.05</math> all)</p>                                                                                                                                                                                                                                                                                                                                                                                                                                                                                                                                                                                                                                                                                                                     |                     |                                    |                                          |                       |                                         |                                                                                                                 |                                                              |                                                                                                          |
| Tian, Y.H. <i>et al.</i><br>(2011) [19]                                                                                                                                                                                                                                                                                                                                                                                                                                                                                                                                                                                                                                                                                                                                                                                                                                                                                                                                                                                                                                                                                                                                            | ICR mice            | N = 18–34 per treatment group      | A1254                                    | 6 or 18 mg/kg/day     | LD 7–21 (exposure mothers) and PND22–42 | In striatum (D <sub>1</sub> and D <sub>2</sub> , DAT) and F-CTX, CG-CTX, MCTX, DS, HIP and DTG (NMDA) using RAR | Immediate freezing of brain after exposure, TOA not reported | Affinity of DA receptors D <sub>1</sub> and D <sub>2</sub> , DA transporter (DAT), binding NMDA receptor |
| <p><b>Result:</b> Sign. decrease of NMDA receptor binding in F-CTX (<math>p &lt; 0.05</math>), C-CTX (<math>p &lt; 0.05</math>), M-CTX (<math>p &lt; 0.01</math>), DS, (<math>p &lt; 0.05</math>), HIP (CA3, <math>p &lt; 0.01</math>) and DT (<math>p &lt; 0.05</math>) after exposure to 18 mg/kg/day</p>                                                                                                                                                                                                                                                                                                                                                                                                                                                                                                                                                                                                                                                                                                                                                                                                                                                                        |                     |                                    |                                          |                       |                                         |                                                                                                                 |                                                              |                                                                                                          |
| Dreiem, A. <i>et al.</i> ,<br>2010 [20]                                                                                                                                                                                                                                                                                                                                                                                                                                                                                                                                                                                                                                                                                                                                                                                                                                                                                                                                                                                                                                                                                                                                            | Long-Evans rats     | N = 5–12 rats, per treatment group | Mixture of A1242, A1248, A1254 and A1260 | 10, 20 or 40 µM       | Single dose on PND7, 14 or 21           | In medium (extraneuronal) and synaptosomes (striatal tissue) using HPLC                                         | Immediate freezing of brain after exposure, TOA not reported | DA level                                                                                                 |
| <p><b>Result:</b> Sign. decrease of synaptosomal DA level at PND7 (<math>p \leq 0.01</math>), PND14 (<math>p \leq 0.001</math>) and PND21 (<math>p \leq 0.05</math>) after exposure to 20 µM; and at PND7 (<math>p \leq 0.001</math>), PND14 (<math>p \leq 0.001</math>) and PND21 (<math>p \leq 0.001</math>) after exposure to 40 µM<br/>Sign. interaction effect between exposure and age (<math>p \leq 0.01</math>), with a decrease of synaptosomal DA level<br/>Sign. increase of extraneuronal (medium) DA level at PND7 (<math>p \leq 0.001</math>), PND14 (<math>p \leq 0.01</math>) and PND21 (<math>p \leq 0.01</math>) after exposure to 10 µM; at PND7 (<math>p \leq 0.001</math>), PND14 (<math>p \leq 0.001</math>) and PND21 (<math>p \leq 0.001</math>) after exposure to 20 µM; and at PND7 (<math>p \leq 0.001</math>), PND14 (<math>p \leq 0.001</math>) and PND21 (<math>p \leq 0.001</math>) after exposure to 40 µM<br/>Sign. increase of synaptosomal DA level on PND14 and PND21, compared to PND7 (<math>p \leq 0.001</math>)<br/>Sign. decrease of extraneuronal (medium) DA level on PND14 and PND21, compared to PND7 (<math>p \leq 0.001</math>)</p> |                     |                                    |                                          |                       |                                         |                                                                                                                 |                                                              |                                                                                                          |

Table S1. Cont.

| Source                                                                                                                                                                                                                                                                                                                                                                                                                                                                                                              | Method                                              |                                             |                       |                                                                                                                                               |                                                                          |                                                                                                         |                                                                | Outcome                                                        |
|---------------------------------------------------------------------------------------------------------------------------------------------------------------------------------------------------------------------------------------------------------------------------------------------------------------------------------------------------------------------------------------------------------------------------------------------------------------------------------------------------------------------|-----------------------------------------------------|---------------------------------------------|-----------------------|-----------------------------------------------------------------------------------------------------------------------------------------------|--------------------------------------------------------------------------|---------------------------------------------------------------------------------------------------------|----------------------------------------------------------------|----------------------------------------------------------------|
|                                                                                                                                                                                                                                                                                                                                                                                                                                                                                                                     | Experimental group                                  | N                                           | Exposure              |                                                                                                                                               |                                                                          | Analysis                                                                                                |                                                                |                                                                |
|                                                                                                                                                                                                                                                                                                                                                                                                                                                                                                                     |                                                     |                                             | Compound              | Dose                                                                                                                                          | Time point/Length                                                        | Location/technique                                                                                      | Time                                                           |                                                                |
| Faro, L.R. <i>et al.</i> , 2009 [21]                                                                                                                                                                                                                                                                                                                                                                                                                                                                                | Adult female Sprague-Dawley rats ( <i>in vivo</i> ) | N = 5–6 per treatment group                 | DDT, lindane, dicofol | 1 mM                                                                                                                                          | 60 min                                                                   | In striatum (extracell.) using microdialysis and HPLC                                                   | 2 h after exposure                                             | DA release                                                     |
| Sign. increase of DA level 80 min after initiation of exposure to DDT ( $p < 0.01$ ) and lindane ( $p < 0.05$ )                                                                                                                                                                                                                                                                                                                                                                                                     |                                                     |                                             |                       |                                                                                                                                               |                                                                          |                                                                                                         |                                                                |                                                                |
| Schuh, R.A. <i>et al.</i> , 2009 [22]                                                                                                                                                                                                                                                                                                                                                                                                                                                                               | Female CD-1 mice                                    | Not reported                                | Methoxychlor          | 16, 32 or 64 mg/kg/day                                                                                                                        | 20 days                                                                  | In striatum using HPLC, WB                                                                              | Freezing of brain within 24 h after exposure, TOA not reported | DA level, DA transporter (DAT), DA turnover, 5-HT level (5-HT) |
| <b>Result:</b> Sign. decrease of DA level after exposure to 64 mg/kg/day ( $p < 0.05$ )<br>Sign. decrease of DAT level after exposure to 16, 32 and 64 mg/kg/day ( $p < 0.05$ )<br>Sign. decrease of DA turnover after exposure to 16 mg/kg/day ( $p < 0.05$ ) and 32 mg/kg/day ( $p < 0.05$ )                                                                                                                                                                                                                      |                                                     |                                             |                       |                                                                                                                                               |                                                                          |                                                                                                         |                                                                |                                                                |
| Gash, D.M. <i>et al.</i> , 2008 [23]                                                                                                                                                                                                                                                                                                                                                                                                                                                                                | Adult male Fischer 344 rats                         | N = 17 per treatment group                  | TCE                   | 1,000 mg/kg/day                                                                                                                               | 5 days a week for 6 weeks                                                | In striatum, SN using HPLC–EC                                                                           | Not reported                                                   | DA level                                                       |
| <b>Result:</b> Sign. decrease of DA level in SN ( $p < 0.05$ )                                                                                                                                                                                                                                                                                                                                                                                                                                                      |                                                     |                                             |                       |                                                                                                                                               |                                                                          |                                                                                                         |                                                                |                                                                |
| Hatcher, J.M. <i>et al.</i> , 2008 [24]                                                                                                                                                                                                                                                                                                                                                                                                                                                                             | Male C57BL/6J mice                                  | N = 6 per treatment group (N = 12 controls) | DDT, DDE, DDD         | Initial exposure of DDT 1 or 3 mg/kg/3 days, DDE 1, 3 or 6 mg/kg/3 days, second exposure of 1, 10 or 100 $\mu$ M of DDT, DDE, DDD or dieldrin | Initial exposure: 30 days (every 3 days)<br>Second exposure: single dose | Cellular, vesicular and synaptosomal analysis using filtration, saturation binding techniques, HPLC, WB | 3 days after treatment                                         | DA level, DA uptake, DA release                                |
| <b>Result:</b> Sign. decrease of DAT-mediated $^3$ H-DA uptake after exposure to 1, 10, or 100 $\mu$ M of DDD; 10 or 100 $\mu$ M of DDT; 100 $\mu$ M of DDE or 100 $\mu$ M of dieldrin ( $p < 0.05$ all)<br>Sign. decrease of $^3$ H-DA release from isolated vesicles after exposure to 100 $\mu$ M of DDD ( $p < 0.05$ )<br>Sign. decrease of synaptosomal $^3$ H-DA release after exposure to 10 or 100 $\mu$ M of DDD; 100 $\mu$ M of DDT; 100 $\mu$ M of DDE or 1 or 100 $\mu$ M of dieldrin ( $p < 0.05$ all) |                                                     |                                             |                       |                                                                                                                                               |                                                                          |                                                                                                         |                                                                |                                                                |

Table S1. Cont.

| Source                                                                                                                                                                                                                                                                                                                                                                                                                                                                                                                                                                                                                                                                                                                                                                                                                                                                                                                                                                                                                                                                                                                                                                                                                                                                                                                                                                                                                                                                                                                                                                                                                                                       | Method                                   |                            |                                                           |                                    |                          |                                                                                                                         |                           | Outcome                                                             |
|--------------------------------------------------------------------------------------------------------------------------------------------------------------------------------------------------------------------------------------------------------------------------------------------------------------------------------------------------------------------------------------------------------------------------------------------------------------------------------------------------------------------------------------------------------------------------------------------------------------------------------------------------------------------------------------------------------------------------------------------------------------------------------------------------------------------------------------------------------------------------------------------------------------------------------------------------------------------------------------------------------------------------------------------------------------------------------------------------------------------------------------------------------------------------------------------------------------------------------------------------------------------------------------------------------------------------------------------------------------------------------------------------------------------------------------------------------------------------------------------------------------------------------------------------------------------------------------------------------------------------------------------------------------|------------------------------------------|----------------------------|-----------------------------------------------------------|------------------------------------|--------------------------|-------------------------------------------------------------------------------------------------------------------------|---------------------------|---------------------------------------------------------------------|
|                                                                                                                                                                                                                                                                                                                                                                                                                                                                                                                                                                                                                                                                                                                                                                                                                                                                                                                                                                                                                                                                                                                                                                                                                                                                                                                                                                                                                                                                                                                                                                                                                                                              | Experimental group                       | N                          | Exposure                                                  |                                    |                          | Analysis                                                                                                                |                           |                                                                     |
|                                                                                                                                                                                                                                                                                                                                                                                                                                                                                                                                                                                                                                                                                                                                                                                                                                                                                                                                                                                                                                                                                                                                                                                                                                                                                                                                                                                                                                                                                                                                                                                                                                                              |                                          |                            | Compound                                                  | Dose                               | Time point/Length        | Location/technique                                                                                                      | Time                      |                                                                     |
| Hatcher, J.M. <i>et al.</i> , 2007 [24]                                                                                                                                                                                                                                                                                                                                                                                                                                                                                                                                                                                                                                                                                                                                                                                                                                                                                                                                                                                                                                                                                                                                                                                                                                                                                                                                                                                                                                                                                                                                                                                                                      | Male C57BL/6J mice                       | N = 12 per treatment group | Dieldrin                                                  | 0.3 mg/kg, 1 mg/kg or 3 mg/kg      | Every 3 days for 30 days | In striatum using HPLC, filtration, WB                                                                                  | 3 days after end exposure | DA level, DA turnover, DAT level, DAT mRNA, DA uptake, DAT binding  |
| <p><b>Result:</b> Sign. decrease of DAT level after exposure to 3 mg/kg (26.9%, <math>p &lt; 0.05</math>) of dieldrin<br/> Sign. decrease of DA turnover (DOPAC/DA) after exposure to 1 mg/kg (32.5%, <math>p &lt; 0.01</math>) and 3 mg/kg (23.5%, <math>p &lt; 0.05</math>) of dieldrin<br/> Sign. decrease of DAT binding sites after exposure to 1 mg/kg (12.4%, <math>p &lt; 0.01</math>) and 3 mg/kg (14.7%, <math>p &lt; 0.01</math>) of dieldrin<br/> Sign. decrease of DAT-mediated <math>^3\text{H}</math>-DA uptake after exposure to 3 mg/kg (21.2%, <math>p &lt; 0.05</math>) of dieldrin</p>                                                                                                                                                                                                                                                                                                                                                                                                                                                                                                                                                                                                                                                                                                                                                                                                                                                                                                                                                                                                                                                   |                                          |                            |                                                           |                                    |                          |                                                                                                                         |                           |                                                                     |
| Lyng G.D. <i>et al.</i> , 2007 [25]                                                                                                                                                                                                                                                                                                                                                                                                                                                                                                                                                                                                                                                                                                                                                                                                                                                                                                                                                                                                                                                                                                                                                                                                                                                                                                                                                                                                                                                                                                                                                                                                                          | Co-cultures of Fetal Sprague-Dawley rats | Not reported               | PCB mixture of 35% A1242, 35% A1248, 15% A1254, 15% A1260 | 2 $\mu\text{M}$ or 8 $\mu\text{M}$ | 1, 3, 7, or 14 days      | In co-cult. of VM, striatum (later separated) and extraneuronal (medium) using HPLC, TH IHC, fluoro jade B labeling, WB | Immediately               | DA level, DA neurons (VM), DAT level                                |
| <p><b>Result:</b> Sign. decrease of DA level in striatum and VM after exposure to 8 <math>\mu\text{M}</math> for 1 day, 3 days, 7 days or 14 days (<math>p \leq 0.05</math> all)<br/> Sign. decrease of DA level in striatum after exposure to 2 <math>\mu\text{M}</math> for 7 days (<math>p \leq 0.001</math>); and in VM after exposure to 2 <math>\mu\text{M}</math> for 14 days (<math>p \leq 0.05</math>)<br/> Sign. increase of extraneuronal (medium) DA level after exposure to 8 <math>\mu\text{M}</math> for 1 day (<math>p \leq 0.001</math>) and 7 days (<math>p \leq 0.01</math>)<br/> Sign. decrease of DA neurons after exposure to 2 <math>\mu\text{M}</math> for 14 days (<math>p \leq 0.01</math>); and to 8 <math>\mu\text{M}</math> for 7 days (28%, <math>p \leq 0.01</math>) and 14 days (48%, <math>p \leq 0.01</math>)<br/> Sign. decrease of DAT protein level in striatum after exposure to 2 <math>\mu\text{M}</math> for 3 days (16% decrease, <math>p \leq 0.05</math>), 7 days (39% decrease, <math>p \leq 0.01</math>) and 14 days (35% decrease, <math>p \leq 0.05</math>); and 8 <math>\mu\text{M}</math> for 3 days (36% decrease, <math>p \leq 0.001</math>), 7 days (57% decrease, <math>p \leq 0.001</math>) and 14 days (62% decrease, <math>p \leq 0.01</math>)<br/> Sign. decrease of DAT protein level in VM after exposure to 2 <math>\mu\text{M}</math> for 7 days (58% decrease, <math>p \leq 0.01</math>) and 14 days (33% decrease, <math>p \leq 0.05</math>); and to 8 <math>\mu\text{M}</math> for 7 days (77% decrease, <math>p \leq 0.05</math>) and 14 days (64% decrease, <math>p \leq 0.01</math>)</p> |                                          |                            |                                                           |                                    |                          |                                                                                                                         |                           |                                                                     |
| Caudle, W. M. <i>et al.</i> , 2006 [26]                                                                                                                                                                                                                                                                                                                                                                                                                                                                                                                                                                                                                                                                                                                                                                                                                                                                                                                                                                                                                                                                                                                                                                                                                                                                                                                                                                                                                                                                                                                                                                                                                      | Adult C57BL/6J mice                      | Not reported               | Mixture of A1254 and A1260                                | 7.5 or 15 mg/kg/day                | 3, 7, 14 or 30 days      | In striatum and VM (DAT mRNA only) using saturation binding techniques, HPLC, WB, RT-PCR                                | 24 h after exposure       | DA level, DA uptake, DAT binding, DAT level, DAT mRNA, SERT binding |
| <p><b>Result:</b> Sign. decrease of striatal DAT level after exposure to 7.5 mg/kg/day after 30 days (<math>p &lt; 0.01</math>); and to 15 mg/day after 14 days (<math>p &lt; 0.01</math>) and 30 days (<math>p &lt; 0.001</math>)<br/> Sign. decrease of <math>^3\text{H}</math>-DA uptake and <math>^3\text{H}</math>-DA binding after exposure to 7.5 mg/kg/day after 14 days (<math>p &lt; 0.05</math> all) and 30 days (<math>p &lt; 0.001</math> all)<br/> Sign. decrease of <math>^3\text{H}</math>-DA uptake and <math>^3\text{H}</math>-DA binding after exposure to 15 mg/kg/day after 14 days (<math>p &lt; 0.001</math> all) and 30 days (<math>p &lt; 0.001</math> all)</p>                                                                                                                                                                                                                                                                                                                                                                                                                                                                                                                                                                                                                                                                                                                                                                                                                                                                                                                                                                     |                                          |                            |                                                           |                                    |                          |                                                                                                                         |                           |                                                                     |



Table S1. Cont.

| Source                          | Method                  |                              |                                                      |                                                                                      |                          |                                                                |                                                               | Outcome                                                                                           |
|---------------------------------|-------------------------|------------------------------|------------------------------------------------------|--------------------------------------------------------------------------------------|--------------------------|----------------------------------------------------------------|---------------------------------------------------------------|---------------------------------------------------------------------------------------------------|
|                                 | Experimental group      | N                            | Exposure                                             |                                                                                      |                          | Analysis                                                       |                                                               |                                                                                                   |
|                                 |                         |                              | Compound                                             | Dose                                                                                 | Time point/Length        | Location/technique                                             | Time                                                          |                                                                                                   |
| Richardson, J. R., 2006 [27]    | C57BL/6J mice           | Not reported                 | Dieldrin                                             | 0.3, 1 or 3 mg/kg/3 days                                                             | Every 3 days for 2 weeks | In striatum and VM (RNA only) using HPLC, WB, RT-PCR           | PND22                                                         | DA level, DA turnover, DAT level, DAT mRNA, 5-HT (5-HT) transporter level, GABA transporter level |
|                                 |                         |                              |                                                      |                                                                                      |                          |                                                                |                                                               |                                                                                                   |
| Vettori, M.V. et al., 2006 [28] | PC12 cell cultures      | Not reported                 | PCB153                                               | 0, 1e-5, 5e-5, 1e-4, 2e-4, 4e-4 M                                                    | Single dose              | HPLC                                                           | 24 h after exposure                                           | DA level                                                                                          |
|                                 |                         |                              |                                                      |                                                                                      |                          |                                                                |                                                               |                                                                                                   |
| Jelaso, A.M. et al., 2005 [29]  | Xenopus laevis tadpoles | N = 12 per treatment group   | A1254                                                | 24, 50, 100, or 200 ppm                                                              | Stage 44/45-64/65        | RT-PCR                                                         | Immediate freezing of embryo after exposure, TOA not reported | Gene expression DA type 2 receptor (D2R)                                                          |
|                                 |                         |                              |                                                      |                                                                                      |                          |                                                                |                                                               |                                                                                                   |
| Seegal, R.F. et al., 2005 [30]  | Sprague-Dawley rats     | N = 2 per treatment group    | PtCB, TCB or ortho-TCB                               | PtCB 0.25 or 1 µg/kg/day, TCB 0.1 or 1 mg/kg/day and ortho-TCB 1, 10 or 20 mg/kg/day | GD6 - PND21              | In PF-CTX using HPLC                                           | Freezing of brain at PND35, 60 or 90, TOA not reported        | DA level                                                                                          |
|                                 |                         |                              |                                                      |                                                                                      |                          |                                                                |                                                               |                                                                                                   |
| Bemis, J.C. et al., 2004 [31]   | Long-Evans rats         | N = 9-18 per treatment group | PCB77, PCB91, PCB95, PCB103, PCB126, PCB153 or A1254 | 2.5, 5, 10, 20, or 40 µM                                                             | 30 min                   | In striatal synaptosomes and extraneuronal (medium) using HPLC | 1-3 days after exposure                                       | DA level                                                                                          |
|                                 |                         |                              |                                                      |                                                                                      |                          |                                                                |                                                               |                                                                                                   |

Table S1. Cont.

| Source                                     | Method                   |              |                |                     |                   |                                   |                                                                    | Outcome                          |
|--------------------------------------------|--------------------------|--------------|----------------|---------------------|-------------------|-----------------------------------|--------------------------------------------------------------------|----------------------------------|
|                                            | Experimental group       | N            | Exposure       |                     |                   | Analysis                          |                                                                    |                                  |
|                                            |                          |              | Compound       | Dose                | Time point/Length | Location/technique                | Time                                                               |                                  |
| Kang, J.H. <i>et al.</i> , 2004 [16]       | Catechola-minergic cells | Not reported | A1254          | 10 µg/mL            | Single dose       | Intracellular analysis using HPLC | 3 h                                                                | DA level                         |
|                                            |                          |              |                |                     |                   |                                   |                                                                    |                                  |
| Lee, D.W. <i>et al.</i> , 2004 [32]        | MN9D cells               | Not reported | A1254          | 1, 5, 10, or 20 ppm | 3, 12, 24 or 48 h | HPLC                              | Not reported                                                       | DA level, DA turnover            |
|                                            |                          |              |                |                     |                   |                                   |                                                                    |                                  |
| Richardson, J.R. <i>et al.</i> , 2004 [33] | C57BL/6J mice            | Not reported | A1016 or A1260 | 500 mg/kg           | Single dose       | In striatum using HPLC, WB        | Freezing of brain 1, 7 or 14 days after exposure, TOA not reported | DA level, DAT level, DA turnover |
|                                            |                          |              |                |                     |                   |                                   |                                                                    |                                  |

**Table S2.** Literature overview organophosphates and neurotransmitters, classified by neurotransmitters. Data is presented in the following order: GABA, Glu, 5-HT, DA.

| Source                                                                                                                                                                                                                                                                                                                                                                                                                                                                                                                                                                                                                                        | Method                           |                             |                |                                          |              |                                                                  |                                              | Outcome                  |
|-----------------------------------------------------------------------------------------------------------------------------------------------------------------------------------------------------------------------------------------------------------------------------------------------------------------------------------------------------------------------------------------------------------------------------------------------------------------------------------------------------------------------------------------------------------------------------------------------------------------------------------------------|----------------------------------|-----------------------------|----------------|------------------------------------------|--------------|------------------------------------------------------------------|----------------------------------------------|--------------------------|
|                                                                                                                                                                                                                                                                                                                                                                                                                                                                                                                                                                                                                                               | Population                       | N                           | Exposure       |                                          |              | Analysis                                                         |                                              |                          |
|                                                                                                                                                                                                                                                                                                                                                                                                                                                                                                                                                                                                                                               | Experimental group               |                             | Compound       | Dose                                     | Period       | Location/ technique                                              | Time                                         |                          |
| <b>GABA</b><br>Montes de Oca, L. <i>et al.</i> , 2013 [34]                                                                                                                                                                                                                                                                                                                                                                                                                                                                                                                                                                                    | Adult male<br>Lister Hooded rats | Not reported                | Chlorpyrifos   | 250 mg/kg                                | Single dose  | In striatum and HIP<br>using HPLC                                | 15 months after exposure                     | GABA level, Glu level    |
| <b>Result:</b> Sign. decrease of GABA level after exposure to chlorpyrifos ( $p \leq 0.05$ )<br>Sign. decrease of Glu level after exposure to chlorpyrifos ( $p \leq 0.05$ )                                                                                                                                                                                                                                                                                                                                                                                                                                                                  |                                  |                             |                |                                          |              |                                                                  |                                              |                          |
| Noriega-Ortega, B.R. <i>et al.</i> , 2011 [35]                                                                                                                                                                                                                                                                                                                                                                                                                                                                                                                                                                                                | Male BALB/c mice                 | N = 20 per treatment group  | Methamido-phos | 2.6 mg/kg                                | Every 3 days | In C-CTX, striatum and HIP<br>using filtration                   | 3, 6 and 9 months, using fractions of 10 min | GABA release, DA release |
| <b>Result:</b> Sign. increase of GABA release in C-CTX after 9 months (fraction 7; $p < 0.001$ and fraction 8; $p < 0.001$ ) of exposure to methamidophos<br>Sign. decrease of GABA release in C-CTX after 3 months (fraction 7; $p < 0.001$ and fraction 8; $p < 0.05$ ) and 6 months (fraction 5; $p < 0.001$ , fraction 6; $p < 0.001$ , fraction 7; $p < 0.001$ and fraction 8; $p < 0.001$ ) of exposure to methamidophos<br>Sign. decrease of GABA release in HIP after 3 months (fraction 7; $p < 0.001$ and fraction 7; $p < 0.001$ ) and 6 months (fraction 7; $p < 0.001$ and fraction 8; $p < 0.05$ ) of exposure to methamidophos |                                  |                             |                |                                          |              |                                                                  |                                              |                          |
| Pourabdol-hosseini, F. <i>et al.</i> , 2009 [36]                                                                                                                                                                                                                                                                                                                                                                                                                                                                                                                                                                                              | Male Wistar rats                 | Not reported                | Paraoxon       | 0, 0.01, 0.1, 1, 10 or 100 $\mu\text{M}$ | 10 min       | In hippocampal synaptosomes using LSS after filtration           | Immediately                                  | GABA uptake              |
| <b>Result:</b> Sign. decrease of GABA uptake after exposure to 0.1 $\mu\text{M}$ ( $p < 0.05$ ) and 1 $\mu\text{M}$ ( $p < 0.05$ ) of paraoxon                                                                                                                                                                                                                                                                                                                                                                                                                                                                                                |                                  |                             |                |                                          |              |                                                                  |                                              |                          |
| Mohammadi, M. <i>et al.</i> , 2008 [37]                                                                                                                                                                                                                                                                                                                                                                                                                                                                                                                                                                                                       | Adult male Wistar rats           | N = 5–7 per treatment group | Paraoxon       | 0.1, 0.3 or 0.7 mg/kg                    | Single dose  | In hippocampal and C-CTX synaptosomes using LSS after filtration | 30 min, 4 or 8 h after exposure              | GABA uptake              |
| <b>Result:</b> Sign. decrease of GABA uptake after exposure to 0.1, 0.3 and 0.7 mg/kg of paraoxon ( $p < 0.001$ all)                                                                                                                                                                                                                                                                                                                                                                                                                                                                                                                          |                                  |                             |                |                                          |              |                                                                  |                                              |                          |
| Shahroukhi, A. <i>et al.</i> , 2007 [38]                                                                                                                                                                                                                                                                                                                                                                                                                                                                                                                                                                                                      | Adult male Wistar rats           | N = 73 (total)              | Paraoxon       | 0, 0.01, 0.1, 1, 10 or 100 $\mu\text{M}$ | 20 min       | In cerebellar synaptosomes using LSS after filtration            | Immediately                                  | GABA uptake              |
| <b>Result:</b> Sign. decrease of GABA uptake after exposure to 1, 10 or 100 $\mu\text{M}$ of paraoxon ( $p < 0.05$ all)                                                                                                                                                                                                                                                                                                                                                                                                                                                                                                                       |                                  |                             |                |                                          |              |                                                                  |                                              |                          |

Table S2. Cont.

| Source                                                                                                                                                                                                                                                                                                                                                                                                                | Method                                                                                                                                                                                                                                                                                                                                                                                                                                                                                                                                                                                                                                                                                                                                                                                                                                                                                                                                                                                             |                               |                          |                                   |             |                                                       |                                                                                                            | Outcome                                             |
|-----------------------------------------------------------------------------------------------------------------------------------------------------------------------------------------------------------------------------------------------------------------------------------------------------------------------------------------------------------------------------------------------------------------------|----------------------------------------------------------------------------------------------------------------------------------------------------------------------------------------------------------------------------------------------------------------------------------------------------------------------------------------------------------------------------------------------------------------------------------------------------------------------------------------------------------------------------------------------------------------------------------------------------------------------------------------------------------------------------------------------------------------------------------------------------------------------------------------------------------------------------------------------------------------------------------------------------------------------------------------------------------------------------------------------------|-------------------------------|--------------------------|-----------------------------------|-------------|-------------------------------------------------------|------------------------------------------------------------------------------------------------------------|-----------------------------------------------------|
|                                                                                                                                                                                                                                                                                                                                                                                                                       | Population                                                                                                                                                                                                                                                                                                                                                                                                                                                                                                                                                                                                                                                                                                                                                                                                                                                                                                                                                                                         | N                             | Exposure                 |                                   |             | Analysis                                              |                                                                                                            |                                                     |
|                                                                                                                                                                                                                                                                                                                                                                                                                       | Experimental group                                                                                                                                                                                                                                                                                                                                                                                                                                                                                                                                                                                                                                                                                                                                                                                                                                                                                                                                                                                 |                               | Compound                 | Dose                              | Period      | Location/ technique                                   | Time                                                                                                       |                                                     |
| Ghasemi, A. <i>et al.</i> , 2007 [39]                                                                                                                                                                                                                                                                                                                                                                                 | Male Wistar rats                                                                                                                                                                                                                                                                                                                                                                                                                                                                                                                                                                                                                                                                                                                                                                                                                                                                                                                                                                                   | Not reported                  | Paraoxon                 | $10^{-9}$ – $10^{-3}$ M           | 20 min      | In C-CTX synaptosomes using LSS after filtration      | Immediately                                                                                                | GABA uptake, $K_m$ and $V_{max}$ (kinetic)          |
| <p><b>Result:</b> Sign. increase of GABA uptake after exposure to <math>10^{-8}</math>, <math>10^{-7}</math>, <math>10^{-6}</math> of paraoxon (<math>p &lt; 0.01</math> for all)</p> <p>Sign. decrease of GABA uptake after exposure to <math>10^{-3}</math> of paraoxon (<math>p &lt; 0.05</math>)</p> <p>Sign. overall decrease of <math>V_{max}</math> after exposure to paraoxon (<math>p &lt; 0.001</math>)</p> |                                                                                                                                                                                                                                                                                                                                                                                                                                                                                                                                                                                                                                                                                                                                                                                                                                                                                                                                                                                                    |                               |                          |                                   |             |                                                       |                                                                                                            |                                                     |
| <b>GLUTAMATE</b>                                                                                                                                                                                                                                                                                                                                                                                                      | Cortical cell cult. Swiss Webster mice                                                                                                                                                                                                                                                                                                                                                                                                                                                                                                                                                                                                                                                                                                                                                                                                                                                                                                                                                             | N = 8–16                      | Chlorpyrifos or Diazinon | CPF: 100 $\mu$ M, DZN: 30 $\mu$ M | 6 h         | In pure and mixed neuronal/ glial cultures using HPLC | Not reported                                                                                               | Glu level                                           |
| Rush, T. <i>et al.</i> , 2010 [40]                                                                                                                                                                                                                                                                                                                                                                                    | <p><b>Result:</b> Sign. increase of extracellular Glu level in mixed neuronal and glial cultures, pure neuronal and pure glial cultures after exposure to chlorpyrifos (<math>p &lt; 0.05</math>)</p>                                                                                                                                                                                                                                                                                                                                                                                                                                                                                                                                                                                                                                                                                                                                                                                              |                               |                          |                                   |             |                                                       |                                                                                                            |                                                     |
| <b>5-HT</b>                                                                                                                                                                                                                                                                                                                                                                                                           | Embryo sea urchins (H. pulcherrimus)                                                                                                                                                                                                                                                                                                                                                                                                                                                                                                                                                                                                                                                                                                                                                                                                                                                                                                                                                               | N = 3–12 per treatment group  | Monocrotophos            | 0.01, 0.10 or 1.00 mg/L           | 12–48 h     | In embryo/larvae using RT-PCR and ELISA               | Immediate freezing of worms at 12-hpf, 15-hpf, 18-hpf, 24-hpf, 30-hpf, 36-hpf, or 48-hpf, TOA not reported | 5-HT level, 5-HT reuptake transporter level (mRNA ) |
| Xu, L. <i>et al.</i> , 2012 [41]                                                                                                                                                                                                                                                                                                                                                                                      | <p><b>Result:</b> Sign. increase of SERT mRNA expression at the 24-hpf stage after exposure to 0.01 mg/L of monocrotophos (<math>p &lt; 0.05</math>); and at the 30-hpf and 36-hpf stage after exposure to 0.01, 0.10 and 1.00 mg/L of monocrotophos (<math>p &lt; 0.05</math> all)</p> <p>Sign. decrease of SERT mRNA expression at the 36-hpf stage and the 48-hpf stage after exposure to 1.00 mg/L of monocrotophos (<math>p &lt; 0.05</math> all)</p> <p>Sign. decrease of 5-HT level at the 18-hpf stage after exposure to 0.01 mg/L of monocrotophos (<math>p &lt; 0.05</math>); and at the 48-hpf stage after exposure to 0.10 (<math>p &lt; 0.05</math>) or 1.00 mg/L of monocrotophos (<math>p &lt; 0.05</math>)</p> <p>Sign. increase of 5-HT level at the 30-hpf stage after exposure to 1.00 mg/L of monocrotophos (<math>p &lt; 0.05</math>); and at the 36-hpf stage after exposure to 0.01 (<math>p &lt; 0.05</math>) or 0.10 mg/L of monocrotophos (<math>p &lt; 0.01</math>)</p> |                               |                          |                                   |             |                                                       |                                                                                                            |                                                     |
| Eddins, D. <i>et al.</i> , 2010 [42]                                                                                                                                                                                                                                                                                                                                                                                  | Zebrafish                                                                                                                                                                                                                                                                                                                                                                                                                                                                                                                                                                                                                                                                                                                                                                                                                                                                                                                                                                                          | N = 30–50 per treatment group | Chlorpyrifos             | 0.29 $\mu$ M                      | 2 hpf–5 dpf | HPLC                                                  | 6 dpf, 22 wpf                                                                                              | 5-HT level, 5-HT turnover, DA level, DA turnover    |
| <p><b>Result:</b> Sign. decrease of DA level and 5-HT level in 6 day old zebrafish larvae after exposure to chlorpyrifos (<math>p &lt; 0.01</math> all)</p> <p>Sign. increase of DA turnover in 6 day old zebrafish larvae after exposure to chlorpyrifos (<math>p &lt; 0.025</math>)</p> <p>Sign. decrease of DA level in adult zebrafish after exposure to chlorpyrifos (<math>p &lt; 0.025</math>)</p>             |                                                                                                                                                                                                                                                                                                                                                                                                                                                                                                                                                                                                                                                                                                                                                                                                                                                                                                                                                                                                    |                               |                          |                                   |             |                                                       |                                                                                                            |                                                     |

Table S2. Cont.

| Source                                   | Method                                                                                                                                                                                                                                                                                                                                                                                                                                          |                              |              |                    |                   |                                                                 |                                                         | Outcome                                                                                |
|------------------------------------------|-------------------------------------------------------------------------------------------------------------------------------------------------------------------------------------------------------------------------------------------------------------------------------------------------------------------------------------------------------------------------------------------------------------------------------------------------|------------------------------|--------------|--------------------|-------------------|-----------------------------------------------------------------|---------------------------------------------------------|----------------------------------------------------------------------------------------|
|                                          | Population                                                                                                                                                                                                                                                                                                                                                                                                                                      | N                            | Exposure     |                    |                   | Analysis                                                        |                                                         |                                                                                        |
|                                          | Experimental group                                                                                                                                                                                                                                                                                                                                                                                                                              |                              | Compound     | Dose               | Period            | Location/ technique                                             | Time                                                    |                                                                                        |
| Moreno, M., 2008 [43]                    | Male Wistar rats                                                                                                                                                                                                                                                                                                                                                                                                                                | N = 5–12 per treatment group | Chlorpyrifos | 250 mg/kg          | Single dose       | In striatum and NACC using HPLC                                 | 2, 7, 15 or 30 days after exposure                      | 5-HT level, 5-HT turnover, DA level, DA turnover                                       |
|                                          | <p><b>Result:</b> Sign. increase of DA turnover (DOPAC/DA ratio) in the striatum 2 days after exposure to chlorpyrifos (<math>p &lt; 0.05</math>)</p> <p>Sign. decrease of 5-HT turnover (5-HIAA/5-HT ratio) in the striatum 7 and 15 days after exposure to chlorpyrifos (<math>p &lt; 0.05</math> all)</p> <p>Sign. decrease of DA level and 5-HT level in the NACC 30 days after exposure to chlorpyrifos (<math>p &lt; 0.05</math> all)</p> |                              |              |                    |                   |                                                                 |                                                         |                                                                                        |
| Slotkin, T.A., <i>et al.</i> , 2008 [44] | Sprague-Dawley rats                                                                                                                                                                                                                                                                                                                                                                                                                             | N = 6 per treatment group    | Diazinon     | 0.5 or 2 mg/kg/day | PND1–4            | In F/PA-CTX, TEM/OC-CTX, BS using saturation binding techniques | Freezing of brain at PND30, 60 or 100, TOA not reported | Binding 5-HT receptors 5HT <sub>1A</sub> and 5HT <sub>2</sub> , 5-HT (5HT) transporter |
|                                          | <p><b>Result:</b> Sign. decrease of 5HT<sub>1A</sub> receptors in male rats exposed to 0.5 mg/kg of diazinon (<math>p &lt; 0.05</math>)</p> <p>Sign. increase of 5HT<sub>1A</sub> transporters in female rats exposed to 0.5 mg/kg of diazinon (<math>p &lt; 0.05</math>)</p>                                                                                                                                                                   |                              |              |                    |                   |                                                                 |                                                         |                                                                                        |
| Slotkin, T.A. <i>et al.</i> , 2007 [45]  | Sprague-Dawley rats                                                                                                                                                                                                                                                                                                                                                                                                                             | N = 8–12 per treatment group | Chlorpyrifos | 1 or 5 mg/kg/day   | GD9–12 or GD17–20 | In striatum, HIP, C-CTX, MID and BS using HPLC                  | Freezing of brain at PND30, TOA not reported            | 5-HT level, 5-HT turnover, DA level, DA turnover                                       |
|                                          | <p><b>Result:</b> Significant main treatment effect (increasing) on 5-HT level in the striatum after exposure from GD17–20 to chlorpyrifos (<math>p &lt; 0.03</math>)</p>                                                                                                                                                                                                                                                                       |                              |              |                    |                   |                                                                 |                                                         |                                                                                        |
| Slotkin, T.A. <i>et al.</i> , 2007 [46]  | Sprague-Dawley rats                                                                                                                                                                                                                                                                                                                                                                                                                             | N = 12 per treatment group   | Chlorpyrifos | 5 mg/kg/day        | PND11–14          | In C-CTX, HIP, MID and BS using HPLC                            | PND21, 30 or 45, TOA not reported                       | 5-HT level, 5-HT turnover                                                              |
|                                          | <p><b>Result:</b> Sign. decrease at PND21 of 5-HT level in BS after exposure to chlorpyrifos (<math>p &lt; 0.05</math>)</p> <p>Sign. increase at PND21 of 5-HT turnover in BS after exposure to chlorpyrifos (<math>p &lt; 0.05</math>)</p>                                                                                                                                                                                                     |                              |              |                    |                   |                                                                 |                                                         |                                                                                        |

Table S2. Cont.

| Source                                                                                                                                                                                                                                                                                                                                                                                                                                                                                                                                                                                                                                                                                                                                                                                                               | Method                           |                            |              |                                                                       |                           |                                                     |                                                                                                   | Outcome                                                            |
|----------------------------------------------------------------------------------------------------------------------------------------------------------------------------------------------------------------------------------------------------------------------------------------------------------------------------------------------------------------------------------------------------------------------------------------------------------------------------------------------------------------------------------------------------------------------------------------------------------------------------------------------------------------------------------------------------------------------------------------------------------------------------------------------------------------------|----------------------------------|----------------------------|--------------|-----------------------------------------------------------------------|---------------------------|-----------------------------------------------------|---------------------------------------------------------------------------------------------------|--------------------------------------------------------------------|
|                                                                                                                                                                                                                                                                                                                                                                                                                                                                                                                                                                                                                                                                                                                                                                                                                      | Population                       | N                          | Exposure     |                                                                       |                           | Analysis                                            |                                                                                                   |                                                                    |
|                                                                                                                                                                                                                                                                                                                                                                                                                                                                                                                                                                                                                                                                                                                                                                                                                      | Experimental group               |                            | Compound     | Dose                                                                  | Period                    | Location/ technique                                 | Time                                                                                              |                                                                    |
| Aldridge, J.E. <i>et al.</i> , 2005 [47]                                                                                                                                                                                                                                                                                                                                                                                                                                                                                                                                                                                                                                                                                                                                                                             | Sprague-Dawley rats              | N = 12 per treatment group | Chlorpyrifos | GD17–20: 1 or 5 mg/kg/day, PND1–4: 1 mg/kg/day, PND11–14: 5 mg/kg/day | GD17–20, PND1–4, PND11–14 | In striatum, C-CTX, HIP, MID and BS using HPLC      | Freezing of brain at PND60, TOA not reported                                                      | 5-HT level, 5-HT turnover, DA level (only at GD17–20), DA turnover |
| <p><b>Result:</b> Sign. effect on 5-HT level after exposure to 5 mg/kg of chlorpyrifos during GD17–20 (<math>p &lt; 0.03</math>)</p> <p>Sign. effect on 5-HT turnover (<math>p &lt; 0.007</math>) after exposure to 1 mg/kg (<math>p &lt; 0.05</math>) and 5 mg/kg chlorpyrifos (<math>p &lt; 0.002</math>) during GD17–20</p> <p>Sign. decrease of hippocampal DA level after exposure to 1 mg/kg (<math>p &lt; 0.04</math>) and 5 mg/kg of chlorpyrifos during GD17–20 (<math>p &lt; 0.04</math>)</p> <p>Sign. increase of DA turnover in the cerebral cortex, stratum and midbrain after exposure to 5 mg/kg of chlorpyrifos during GD17–20 (<math>p &lt; 0.02</math>)</p> <p>Sign. overall decrease of 5-HT level in females after exposure to 1 mg/kg chlorpyrifos during PND1–4 (<math>p &lt; 0.03</math>)</p> |                                  |                            |              |                                                                       |                           |                                                     |                                                                                                   |                                                                    |
| <b>DA</b>                                                                                                                                                                                                                                                                                                                                                                                                                                                                                                                                                                                                                                                                                                                                                                                                            | PC12 cell cult.                  | Not reported               | Chlorpyrifos | 100 $\mu$ M                                                           | 12 h                      | Intracellular and extraneuronal (medium) using HPLC | Not reported                                                                                      | DA level                                                           |
| Lee, J.E. <i>et al.</i> , 2012 [17]                                                                                                                                                                                                                                                                                                                                                                                                                                                                                                                                                                                                                                                                                                                                                                                  | adult female Sprague-Dawley rats |                            |              |                                                                       |                           |                                                     |                                                                                                   |                                                                    |
| <p><b>Result:</b> Sign. decrease of intracellular DA level after exposure to chlorpyrifos (<math>p &lt; 0.01</math>)</p> <p>Sign. decrease of extraneuronal (medium) DA level after exposure to chlorpyrifos (<math>p &lt; 0.01</math>)</p>                                                                                                                                                                                                                                                                                                                                                                                                                                                                                                                                                                          |                                  |                            |              |                                                                       |                           |                                                     |                                                                                                   |                                                                    |
| Binukumar, B.K. <i>et al.</i> , 2011 [48]                                                                                                                                                                                                                                                                                                                                                                                                                                                                                                                                                                                                                                                                                                                                                                            | Male Wistar rats                 | N = 10 per treatment group | Dichlorvos   | 2.50 mg/kg/day                                                        | 12 weeks                  | In SN and CS using HPLC                             | Not reported                                                                                      | DA level                                                           |
| <p><b>Result:</b> Sign. decrease of DA level in SN and CS after exposure to dichlorvos (<math>p &lt; 0.001</math>)</p>                                                                                                                                                                                                                                                                                                                                                                                                                                                                                                                                                                                                                                                                                               |                                  |                            |              |                                                                       |                           |                                                     |                                                                                                   |                                                                    |
| Chen, X.P. <i>et al.</i> , 2011 [49]                                                                                                                                                                                                                                                                                                                                                                                                                                                                                                                                                                                                                                                                                                                                                                                 | ICR mice                         | N = 6 per treatment group  | Chlorpyrifos | 5 mg/kg <sup>-1</sup> /day                                            | GD7.5–11.5 or GD13–17     | In C-CTX and HIP using fluorescence techniques      | Freezing of C-CTX at GD17, PND14, and PND60, freezing of HIP at PND14 and PND60, TOA not reported | DA level                                                           |
| <p><b>Result:</b> Sign. decrease of DA level in C-CTX at GD17 (<math>p &lt; 0.01</math>) and PND14 (<math>p &lt; 0.05</math>) after exposure to chlorpyrifos during GD7.5–11.5; and at PND14 (<math>p &lt; 0.01</math>) and PND60 (<math>p &lt; 0.01</math>) after exposure to chlorpyrifos during GD13–17</p> <p>Sign. decrease of DA level in the HIP at PND14 (<math>p &lt; 0.01</math>) and PND60 (<math>p &lt; 0.01</math>) after exposure to chlorpyrifos during GD7.5–11.5</p>                                                                                                                                                                                                                                                                                                                                |                                  |                            |              |                                                                       |                           |                                                     |                                                                                                   |                                                                    |

Table S2. Cont.

| Source                                                                                                                                                                                                                                                                                                                                                                                                                                                                                                                       | Method                         |                             |                                |                                                                                                                                         |                             |                                                                          |                                                                                              | Outcome                                    |
|------------------------------------------------------------------------------------------------------------------------------------------------------------------------------------------------------------------------------------------------------------------------------------------------------------------------------------------------------------------------------------------------------------------------------------------------------------------------------------------------------------------------------|--------------------------------|-----------------------------|--------------------------------|-----------------------------------------------------------------------------------------------------------------------------------------|-----------------------------|--------------------------------------------------------------------------|----------------------------------------------------------------------------------------------|--------------------------------------------|
|                                                                                                                                                                                                                                                                                                                                                                                                                                                                                                                              | Population                     | N                           | Exposure                       |                                                                                                                                         |                             | Analysis                                                                 |                                                                                              |                                            |
|                                                                                                                                                                                                                                                                                                                                                                                                                                                                                                                              | Experimental group             |                             | Compound                       | Dose                                                                                                                                    | Period                      | Location/ technique                                                      | Time                                                                                         |                                            |
| Sledge, D. <i>et al.</i> , 2011 [50]                                                                                                                                                                                                                                                                                                                                                                                                                                                                                         | Zebrafish embryos              | N = 18–34 per group         | Chlorpyrifos                   | 100 ng/mL                                                                                                                               | dpf 1, 1–2, 1–3, 1–4 or 1–5 | In whole brain using HPLC                                                | Not reported                                                                                 | DA level, 5-HT level                       |
| <b>Result:</b> Sign. decreasing linear duration effect of exposure to chlorpyrifos on DA level ( $p < 0.025$ )<br>Sign. decrease of DA level after exposure to chlorpyrifos during dpf 1–5 ( $p < 0.05$ )                                                                                                                                                                                                                                                                                                                    |                                |                             |                                |                                                                                                                                         |                             |                                                                          |                                                                                              |                                            |
| Binukumar, B.K. <i>et al.</i> , 2010 [51]                                                                                                                                                                                                                                                                                                                                                                                                                                                                                    | Male Wistar rats               | N = 6 per treatment group   | Dichlorvos                     | 2.5 mg/kg/day                                                                                                                           | 12 weeks                    | In SN and CS using HPLC                                                  | Not reported                                                                                 | DA level                                   |
| <b>Result:</b> Sign. decrease of DA level in SN and CS after exposure to dichlorvos ( $p < 0.001$ )                                                                                                                                                                                                                                                                                                                                                                                                                          |                                |                             |                                |                                                                                                                                         |                             |                                                                          |                                                                                              |                                            |
| Eells, J.B. <i>et al.</i> , 2009 [52]                                                                                                                                                                                                                                                                                                                                                                                                                                                                                        | Sprague-Dawley rats            | Not reported                | Chlorpyrifos, Methyl parathion | CPF: 1.5 mg PND1–7, 3 mg/kg/day PND8–14, 6 mg/kg/day PND15–21, MPT: 0.3 mg/kg/day PND1–7, 0.6 mg/kg/day PND8–14, 0.9 mg/kg/day PND15–21 | PND1–21                     | In striatum using HPLC and RT-PCR                                        | Freezing of brain at PND22 or PND50, TOA not reported                                        | DA level, DA turnover, gene expression DAT |
| <b>Result:</b> Sign. increase at PND50 of DA (DOPAC/DA) turnover after exposure to chlorpyrifos ( $p < 0.05$ )                                                                                                                                                                                                                                                                                                                                                                                                               |                                |                             |                                |                                                                                                                                         |                             |                                                                          |                                                                                              |                                            |
| Damodaran, T.V. <i>et al.</i> , 2006 [53]                                                                                                                                                                                                                                                                                                                                                                                                                                                                                    | Adult male Sprague-Dawley rats | Not reported                | Sarin                          | 50 or 100 µg/kg                                                                                                                         | Single dose                 | In whole brain using several techniques, including microarray and RT-PCR | Freezing of brain 15 min (50 µg/kg) or 3 months (100 µg/kg) after exposure, TOA not reported | Gene expression all genes (no selection)   |
| <b>Result:</b> Sign. upregulation of GABA <sub>B</sub> receptor 1d (Gabbr-1), GABA <sub>A</sub> receptor alpha-1 subunit (Gabra1), DRd4, 5-HT receptor (Htr6) and 5-HT neurotransmitter transporter (Slc6a4) after 50 µg/kg of exposure to sarin ( $p < 0.05$ all)<br>Sign. upregulation of GABA <sub>B</sub> receptor 1d (Gabbr-1), GABA <sub>A</sub> receptor alpha-3 subunit (Gabra3), GABA <sub>A</sub> receptor beta-3 subunit (Gabbr3) and Glu receptor (Gria1) after 100 µg/kg of exposure to sarin ( $p < 0.05$ all) |                                |                             |                                |                                                                                                                                         |                             |                                                                          |                                                                                              |                                            |
| Padilla, S. <i>et al.</i> , 2005 [54]                                                                                                                                                                                                                                                                                                                                                                                                                                                                                        | Male Long-Evans rats           | N = 5–8 per treatment group | Chlorpyrifos                   | 0, 1, or 5 mg/kg/day, additional spike doses of 60 mg/kg (2 months) and 45 mg/kg (4, 6, 8, 10, 12 months)                               | 6 or 12 months              | In striatum using incubation and filtration                              | Freezing of brain at 6, 12 or 15 months, TOA not reported                                    | DA level, DAT density                      |
| <b>Result:</b> Significant increase of DAT density 24 hours after exposure to a spike after 6 months of exposure to 0 mg/kg/day ( $p < 0.05$ ), 1 mg/kg/day ( $p < 0.05$ ) or 5 mg/kg/day ( $p < 0.05$ ) of chlorpyrifos                                                                                                                                                                                                                                                                                                     |                                |                             |                                |                                                                                                                                         |                             |                                                                          |                                                                                              |                                            |

**Table S3.** Literature overview phthalates and neurotransmitters, classified by neurotransmitters. Data is presented in the following order: GABA, Glu, 5-HT, DA.

| Source                                                                                                                                                                                                                                                                                                                                                                                                                                                                                                                                                                                                                                                                                                                                                                                                                                                                                                                                                                                                                                                                                                                                                                                                                                                                                                                                                                                                                                                                                                                                                                                                                                                                                                                                                    | Method             |              |          |                   |                    |                                      |                                                    | Outcome                                                                                                                               |
|-----------------------------------------------------------------------------------------------------------------------------------------------------------------------------------------------------------------------------------------------------------------------------------------------------------------------------------------------------------------------------------------------------------------------------------------------------------------------------------------------------------------------------------------------------------------------------------------------------------------------------------------------------------------------------------------------------------------------------------------------------------------------------------------------------------------------------------------------------------------------------------------------------------------------------------------------------------------------------------------------------------------------------------------------------------------------------------------------------------------------------------------------------------------------------------------------------------------------------------------------------------------------------------------------------------------------------------------------------------------------------------------------------------------------------------------------------------------------------------------------------------------------------------------------------------------------------------------------------------------------------------------------------------------------------------------------------------------------------------------------------------|--------------------|--------------|----------|-------------------|--------------------|--------------------------------------|----------------------------------------------------|---------------------------------------------------------------------------------------------------------------------------------------|
|                                                                                                                                                                                                                                                                                                                                                                                                                                                                                                                                                                                                                                                                                                                                                                                                                                                                                                                                                                                                                                                                                                                                                                                                                                                                                                                                                                                                                                                                                                                                                                                                                                                                                                                                                           | Population         | N            | Exposure |                   |                    | Analysis                             |                                                    |                                                                                                                                       |
|                                                                                                                                                                                                                                                                                                                                                                                                                                                                                                                                                                                                                                                                                                                                                                                                                                                                                                                                                                                                                                                                                                                                                                                                                                                                                                                                                                                                                                                                                                                                                                                                                                                                                                                                                           | Experimental group |              | Compound | Dose              | Length             | Location/ Technique                  | Time                                               |                                                                                                                                       |
| <b>GABA</b><br>Carbone, S. <i>et al.</i> , 2012<br>[55]                                                                                                                                                                                                                                                                                                                                                                                                                                                                                                                                                                                                                                                                                                                                                                                                                                                                                                                                                                                                                                                                                                                                                                                                                                                                                                                                                                                                                                                                                                                                                                                                                                                                                                   | Wistar rats        | N = 8–10     | DEHP     | 3 or 30 mg/kg/day | GD1-weaning        | In HIP using HPLC                    | Freezing at PND30, TOA not reported                | GABA level                                                                                                                            |
| <b>Result:</b> Sign. increase of GABA level in peripubertal male rats after exposure to 30 mg/kg of DEHP ( $p < 0.01$ )                                                                                                                                                                                                                                                                                                                                                                                                                                                                                                                                                                                                                                                                                                                                                                                                                                                                                                                                                                                                                                                                                                                                                                                                                                                                                                                                                                                                                                                                                                                                                                                                                                   |                    |              |          |                   |                    |                                      |                                                    |                                                                                                                                       |
| Carbone, S. <i>et al.</i> , 2010<br>[56]                                                                                                                                                                                                                                                                                                                                                                                                                                                                                                                                                                                                                                                                                                                                                                                                                                                                                                                                                                                                                                                                                                                                                                                                                                                                                                                                                                                                                                                                                                                                                                                                                                                                                                                  | Wistar male rats   | N = 10       | DEHP     | 3 or 30 mg/kg/day | GD1-weaning        | In HIP using HPLC                    | Freezing at PND15, TOA not reported                | GABA level, Glu level                                                                                                                 |
| <b>Result:</b> Sign. decrease of GABA level in prepubertal male rats after exposure to 30 mg/kg of DEHP ( $p < 0.01$ )<br>Sign. increase of GABA level in prepubertal female rats after exposure to 30 mg/kg of DEHP ( $p < 0.01$ )                                                                                                                                                                                                                                                                                                                                                                                                                                                                                                                                                                                                                                                                                                                                                                                                                                                                                                                                                                                                                                                                                                                                                                                                                                                                                                                                                                                                                                                                                                                       |                    |              |          |                   |                    |                                      |                                                    |                                                                                                                                       |
| <b>GLUTAMATE 5-HT DA</b><br>Ishido, M. <i>et al.</i> , 2004<br>[57]                                                                                                                                                                                                                                                                                                                                                                                                                                                                                                                                                                                                                                                                                                                                                                                                                                                                                                                                                                                                                                                                                                                                                                                                                                                                                                                                                                                                                                                                                                                                                                                                                                                                                       | Male Wistar rats   | Not reported | DCHP     | 29 µg             | Single dose (PND5) | In striatum and MID using macroarray | Freezing at 4 and 8 weeks of age, TOA not reported | Gene expression of: GABA transporters/receptors, Glu transporters/ receptors, DA transporters/receptors, 5-HT transporters/ receptors |
| <b>Result:</b> Upregulation of ionotropic Glu receptor epsilon 2 (ratio 1.60); metabotropic Glu receptor 1 (ratio 3.50); metabotropic Glu receptor 4 (ratio 1.86); metabotropic Glu receptor 7 (ratio 1.80); Glu transporter (ratio 4.50); GABA-A receptor alpha 1 (ratio 2.50); GABA-A receptor alpha 2 (ratio 4.75); GABA-A receptor beta 3 (ratio 2.25); GABA transporter 1 (ratio 2.30) in the striatum after exposure to DHCP, at 4 weeks<br>Upregulation of GABA-A receptor gamma 2 (ratio 1.60); GABA-B receptor 1a + 1b (ratio 1.80); GABA transporter 2 (ratio 1.70) in MID after exposure to DHCP, at 4 weeks<br>Upregulation of 5-HT receptor 4 (ratio 1.75); ionotropic Glu receptor 1 (ratio 4.60), ionotropic Glu receptor 3 (ratio 2.00); GABA-A receptor delta (ratio 1.62) in the striatum after exposure to DHCP, at 8 weeks<br>Upregulation of ionotropic Glu receptor 5 (ratio 2.00); metabotropic Glu receptor 4 (ratio 2.00); metabotropic Glu receptor 7 (ratio 2.30); GABA-A receptor alpha 1 (ratio 1.60) in the midbrain after exposure to DHCP, at 8 weeks<br>Upregulation of 5-HT receptor 1F (ratio 1.50); Glu transporters (ratio 1.30-1.70) in the midbrain after exposure to DCHP, at 4 weeks and 8 weeks<br>Downregulation of DA receptor D4 (ratio 0.22); metabotropic Glu receptor 5 (ratio 0.20) in the striatum after exposure to DHCP, at 4 weeks<br>Downregulation of DA transporter (ratio 0.50); ionotropic Glu receptor 1 (ratio 0.50); ionotropic Glu receptor epsilon 3 (ratio 0.40); GABA-A receptor gamma 1 (ratio 0.50); GABA transporter 1 (ratio 0.40) in MID after exposure to DHCP, at 4 weeks<br>Downregulation of GABA transporter 2 (ratio 0.46) in the midbrain after exposure to DHCP, at 8 weeks |                    |              |          |                   |                    |                                      |                                                    |                                                                                                                                       |



Table S3. Cont.

| Source                                                                                                                                                                                                                                                                                                                                                          | Method             |              |           |               |                    |                                      |                                              | Outcome                                                                                                                          |
|-----------------------------------------------------------------------------------------------------------------------------------------------------------------------------------------------------------------------------------------------------------------------------------------------------------------------------------------------------------------|--------------------|--------------|-----------|---------------|--------------------|--------------------------------------|----------------------------------------------|----------------------------------------------------------------------------------------------------------------------------------|
|                                                                                                                                                                                                                                                                                                                                                                 | Population         | N            | Exposure  |               |                    | Analysis                             |                                              |                                                                                                                                  |
|                                                                                                                                                                                                                                                                                                                                                                 | Experimental group |              | Compound  | Dose          | Length             | Location/ Technique                  | Time                                         |                                                                                                                                  |
| Masuo, Y. <i>et al.</i> , 2004 [58]                                                                                                                                                                                                                                                                                                                             | Male Wistar rats   | Not reported | DEHP      | 87 nmol/10 µL | Single dose (PND5) | In striatum and MID using macroarray | Freezing at 8 weeks of age, TOA not reported | Gene expression of: DA receptor drd1a, drd2, drd4, DA transporter DAT1, Glu receptor grin1, Glu transporter glast                |
| <p><b>Result:</b> Downregulation of drd1a (ratio 0.48) and grin1 (ratio 0.41) in MID after exposure to DEHP</p> <p>Upregulation of glast in MID after exposure to DEHP (ratio 2.30)</p> <p>Downregulation of grin1 in the striatum after exposure to DEHP (ratio 0.10)</p>                                                                                      |                    |              |           |               |                    |                                      |                                              |                                                                                                                                  |
| Masuo, Y. <i>et al.</i> , 2004 [59]                                                                                                                                                                                                                                                                                                                             | Male Wistar rats   | Not reported | DEHP, DBP | 87 nmol/10 µL | Single dose (PND5) | In striatum and MID using macroarray | Freezing at 8 weeks of age, TOA not reported | Gene expression of: GABA transporter gat3, Glu receptor grin1, Glu transporter glast, DA receptor 1 dat1 and DA transporter drd4 |
| <p><b>Result:</b> Downregulation of grin1 (ratio 0.10), gat3 (ratio 0.38), drd4 (ratio 0.20) in the striatum after exposure to DEHP (ratio 0.50) or DBP</p> <p>Upregulation of grin1 (ratio 1.58) and drd4 (ratio 1.83) in MID after exposure to DEHP</p> <p>Upregulation of glast in the midbrain after exposure to DEHP (ratio 2.10) and DBP (ratio 2.30)</p> |                    |              |           |               |                    |                                      |                                              |                                                                                                                                  |

\* Only significant results are reported. In case no significant results were found at all, the phrase "No significant results were found" was added to the result section.

## References

1. Elnar, A.A.; Diesel, B.; Desor, F.; Feidt, C.; Bouayed, J.; Kiemer, A.K.; Soulimani, R. Neurodevelopmental and behavioral toxicity via lactational exposure to the sum of six indicator non-dioxin-like-polychlorinated biphenyls (summation operator6 NDL-PCBs) in mice. *Toxicology* **2012**, *299*, 44–54.
2. Dickerson, S.M.; Cunningham, S.L.; Gore, A.C. Prenatal pcbs disrupt early neuroendocrine development of the rat hypothalamus. *Toxicol. Appl. Pharmacol.* **2011**, *252*, 36–46.
3. Boix, J.; Cauli, O.; Felipo, V. Developmental exposure to polychlorinated biphenyls 52, 138 or 180 affects differentially learning or motor coordination in adult rats. Mechanisms involved. *Neuroscience* **2010**, *167*, 994–1003.
4. Martyniuk, C.J.; Feswick, A.; Spade, D.J.; Kroll, K.J.; Barber, D.S.; Denslow, N.D. Effects of acute dieldrin exposure on neurotransmitters and global gene transcription in largemouth bass (*Micropterus salmoides*) hypothalamus. *Neurotoxicology* **2010**, *31*, 356–366.
5. Cabaleiro, T.; Caride, A.; Romero, A.; Lafuente, A. Effects of *in utero* and lactational exposure to endosulfan in prefrontal cortex of male rats. *Toxicol. Lett.* **2008**, *176*, 58–67.
6. Babot, Z.; Vilaro, M.T.; Sunol, C. Long-term exposure to dieldrin reduces gamma-aminobutyric acid type a and n-methyl-d-aspartate receptor function in primary cultures of mouse cerebellar granule cells. *J. Neurosci. Res.* **2007**, *85*, 3687–3695.
7. Lafuente, A.; Cabaleiro, T.; Caride, A.; Gutierrez, A.; Esquifino, A.I. Toxic effects of methoxychlor in rat striatum: Modifications in several neurotransmitters. *J. Physiol. Biochem.* **2007**, *63*, 171–177.
8. Yuk, J.; Simpson, M.J.; Simpson, A.J. 1-D and 2-D NMR-based metabolomics of earthworms exposed to endosulfan and endosulfan sulfate in soil. *Environ. Pollut.* **2013**, *175*, 35–44.
9. Hilgier, W.; Lazarewicz, J.W.; Struzynska, L.; Frontczak-Baniewicz, M.; Albrecht, J. Repeated exposure of adult rats to Aroclor 1254 induces neuronal injury and impairs the neurochemical manifestations of the NMDA receptor-mediated intracellular signaling in the hippocampus. *Neurotoxicology* **2012**, *33*, 16–22.
10. Struzynska, L.; Sulkowski, G.; Dabrowska-Bouta, B. Aroclor 1254 selectively inhibits expression of glial GLT-1 glutamate transporter in the forebrain of chronically exposed adult rat. *Toxicology* **2012**, *300*, 12–18.
11. Boix, J.; Cauli, O.; Leslie, H.; Felipo, V. Differential long-term effects of developmental exposure to polychlorinated biphenyls 52, 138 or 180 on motor activity and neurotransmission. Gender dependence and mechanisms involved. *Neurochem. Int.* **2011**, *58*, 69–77.
12. Stavenes Andersen, I.; Voie, O.A.; Fonnum, F.; Mariussen, E. Effects of methyl mercury in combination with polychlorinated biphenyls and brominated flame retardants on the uptake of glutamate in rat brain synaptosomes: A mathematical approach for the study of mixtures. *Toxicol. Sci.* **2009**, *112*, 175–184.
13. Honma, T.; Suda, M.; Miyagawa, M.; Wang, R.S.; Kobayashi, K.; Sekiguchi, S. Alteration of brain neurotransmitters in female rat offspring induced by prenatal administration of 16 and 64 mg/kg of 2,2',4,4',5,5'-hexachlorobiphenyl (PCB153). *Ind. Health* **2009**, *47*, 11–21.

14. Lafuente, A.; Cabaleiro, T.; Caride, A.; Esquifino, A.I. Toxic effects of methoxychlor administered subcutaneously on the hypothalamic-pituitary-testicular axis in adult rats. *Food Chem. Toxicol.* **2008**, *46*, 1570–1575.
15. Castoldi, A.F.; Blandini, F.; Randine, G.; Samuele, A.; Manzo, L.; Coccini, T. Brain monoaminergic neurotransmission parameters in weanling rats after perinatal exposure to methylmercury and 2,2',4,4',5,5'-hexachlorobiphenyl (PCB153). *Brain Res.* **2006**, *1112*, 91–98.
16. Khan, I.A.; Thomas, P. Aroclor 1254 inhibits tryptophan hydroxylase activity in rat brain. *Arch. Toxicol.* **2004**, *78*, 316–320.
17. Lee, J.E.; Park, J.H.; Shin, I.C.; Koh, H.C. Reactive oxygen species regulated mitochondria-mediated apoptosis in pc12 cells exposed to chlorpyrifos. *Toxicol. Appl. Pharmacol.* **2012**, *263*, 148–162.
18. Coccini, T.; Roda, E.; Castoldi, A.F.; Poli, D.; Goldoni, M.; Vettori, M.V.; Mutti, A.; Manzo, L. Developmental exposure to methylmercury and 2,2',4,4',5,5'-hexachlorobiphenyl (PCB153) affects cerebral dopamine d1-like and d2-like receptors of weanling and pubertal rats. *Arch. Toxicol.* **2011**, *85*, 1281–1294.
19. Tian, Y.H.; Hwan, K.S.; Lee, S.Y.; Jang, C.G. Lactational and postnatal exposure to polychlorinated biphenyls induces sex-specific anxiolytic behavior and cognitive deficit in mice offspring. *Synapse* **2011**, *65*, 1032–1041.
20. Dreiem, A.; Okoniewski, R.J.; Brosch, K.O.; Miller, V.M.; Seegal, R.F. Polychlorinated biphenyls and polybrominated diphenyl ethers alter striatal dopamine neurochemistry in synaptosomes from developing rats in an additive manner. *Toxicol. Sci.* **2010**, *118*, 150–159.
21. Faro, L.R.; Alfonso, M.; Cervantes, R.; Duran, R. Comparative effects of pesticides on *in vivo* dopamine release in freely moving rats. *Basic Clin. Pharmacol. Toxicol.* **2009**, *105*, 395–400.
22. Schuh, R.A.; Richardson, J.R.; Gupta, R.K.; Flaws, J.A.; Fiskum, G. Effects of the organochlorine pesticide methoxychlor on dopamine metabolites and transporters in the mouse brain. *Neurotoxicology* **2009**, *30*, 274–280.
23. Gash, D.M.; Rutland, K.; Hudson, N.L.; Sullivan, P.G.; Bing, G.; Cass, W.A.; Pandya, J.D.; Liu, M.; Choi, D.Y.; Hunter, R.L.; *et al.* Trichloroethylene: Parkinsonism and complex 1 mitochondrial neurotoxicity. *Ann. Neurol.* **2008**, *63*, 184–192.
24. Hatcher, J.M.; Richardson, J.R.; Guillot, T.S.; McCormack, A.L.; Di Monte, D.A.; Jones, D.P.; Pennell, K.D.; Miller, G.W. Dieldrin exposure induces oxidative damage in the mouse nigrostriatal dopamine system. *Exp. Neurol.* **2007**, *204*, 619–630.
25. Lyng, G.D.; Snyder-Keller, A.; Seegal, R.F. Polychlorinated biphenyl-induced neurotoxicity in organotypic cocultures of developing rat ventral mesencephalon and striatum. *Toxicol. Sci.* **2007**, *97*, 128–139.
26. Caudle, W.M.; Richardson, J.R.; Delea, K.C.; Guillot, T.S.; Wang, M.; Pennell, K.D.; Miller, G.W. Polychlorinated biphenyl-induced reduction of dopamine transporter expression as a precursor to Parkinson's disease-associated dopamine toxicity. *Toxicol. Sci.* **2006**, *92*, 490–499.
27. Richardson, J.R.; Caudle, W.M.; Wang, M.; Dean, E.D.; Pennell, K.D.; Miller, G.W. Developmental exposure to the pesticide dieldrin alters the dopamine system and increases neurotoxicity in an animal model of Parkinson's disease. *FASEB J.* **2006**, *20*, 1695–1697.

28. Vettori, M.V.; Goldoni, M.; Caglieri, A.; Poli, D.; Folesani, G.; Ceccatelli, S.; Mutti, A. Antagonistic effects of methyl-mercury and pcb153 on pc12 cells after a combined and simultaneous exposure. *Food Chem. Toxicol.* **2006**, *44*, 1505–1512.
29. Jelaso, A.M.; DeLong, C.; Means, J.; Ide, C.F. Dietary exposure to aroclor 1254 alters gene expression in xenopus laevis frogs. *Environ. Res.* **2005**, *98*, 64–72.
30. Seegal, R.F.; Brosch, K.O.; Okoniewski, R.J. Coplanar PCB congeners increase uterine weight and frontal cortical dopamine in the developing rat: Implications for developmental neurotoxicity. *Toxicol. Sci.* **2005**, *86*, 125–131.
31. Bemis, J.C.; Seegal, R.F. PCB-induced inhibition of the vesicular monoamine transporter predicts reductions in synaptosomal dopamine content. *Toxicol. Sci.* **2004**, *80*, 288–295.
32. Lee, D.W.; Opanashuk, L.A. Polychlorinated biphenyl mixture aroclor 1254-induced oxidative stress plays a role in dopaminergic cell injury. *Neurotoxicology* **2004**, *25*, 925–939.
33. Richardson, J.R.; Miller, G.W. Acute exposure to aroclor 1016 or 1260 differentially affects dopamine transporter and vesicular monoamine transporter 2 levels. *Toxicol. Lett.* **2004**, *148*, 29–40.
34. Montes de Oca, L.; Moreno, M.; Cardona, D.; Campa, L.; Sunol, C.; Galofre, M.; Flores, P.; Sanchez-Santed, F. Long term compulsivity on the 5-choice serial reaction time task after acute chlorpyrifos exposure. *Toxicol. Lett.* **2013**, *216*, 73–85.
35. Noriega-Ortega, B.R.; Armienta-Aldana, E.; Cervantes-Pompa, J.A.; Hernandez-Ruiz, E.; Chaparro-Huerta, V.; Bravo-Cuellar, A.; Beas-Zarate, C. Gaba and dopamine release from different brain regions in mice with chronic exposure to organophosphate methamidophos. *J. Toxicol. Pathol.* **2011**, *24*, 163–168.
36. Pourabdolhossein, F.; Ghasemi, A.; Shahroukhi, A.; Sherafat, M.A.; Khoshbaten, A.; Asgari, A. *In vitro* assessment of paraoxon effects on gaba uptake in rat hippocampal synaptosomes. *Toxicol. In Vitro* **2009**, *23*, 868–873.
37. Mohammadi, M.; Ghani, E.; Ghasemi, A.; Khoshbaten, A.; Asgari, A. Synaptosomal GABA uptake decreases in paraoxon-treated rat brain. *Toxicology* **2008**, *244*, 42–48.
38. Shahroukhi, A.; Ghasemi, A.; Poorabdolhossein, F.; Asgari, A.; Khoshbaten, A. The effect of paraoxon on GABA uptake in rat cerebellar synaptosomes. *Med. Sci. Monit.* **2007**, *13*, BR194–BR199.
39. Ghasemi, A.; Sadidi, A.; Mohammadi, M.; Khoshbaten, A.; Asgari, A. Paraoxon inhibits GABA uptake in brain synaptosomes. *Toxicol. In Vitro* **2007**, *21*, 1499–1504.
40. Rush, T.; Liu, X.Q.; Hjelmhaug, J.; Lobner, D. Mechanisms of chlorpyrifos and diazinon induced neurotoxicity in cortical culture. *Neuroscience* **2010**, *166*, 899–906.
41. Xu, L.; Tian, H.; Wang, W.; Ru, S. Effects of monocrotophos pesticide on serotonin metabolism during early development in the sea urchin, hemicentrotus pulcherrimus. *Environ. Toxicol. Pharmacol.* **2012**, *34*, 537–547.
42. Eddins, D.; Cerutti, D.; Williams, P.; Linney, E.; Levin, E.D. Zebrafish provide a sensitive model of persisting neurobehavioral effects of developmental chlorpyrifos exposure: Comparison with nicotine and pilocarpine effects and relationship to dopamine deficits. *Neurotoxicol. Teratol.* **2010**, *32*, 99–108.

43. Moreno, M.; Canadas, F.; Cardona, D.; Sunol, C.; Campa, L.; Sanchez-Amate, M.C.; Flores, P.; Sanchez-Santed, F. Long-term monoamine changes in the striatum and nucleus accumbens after acute chlorpyrifos exposure. *Toxicol. Lett.* **2008**, *176*, 162–167.
44. Slotkin, T.A.; Ryde, I.T.; Levin, E.D.; Seidler, F.J. Developmental neurotoxicity of low dose diazinon exposure of neonatal rats: Effects on serotonin systems in adolescence and adulthood. *Brain Res. Bull.* **2008**, *75*, 640–647.
45. Slotkin, T.A.; Seidler, F.J. Prenatal chlorpyrifos exposure elicits presynaptic serotonergic and dopaminergic hyperactivity at adolescence: Critical periods for regional and sex-selective effects. *Reprod. Toxicol.* **2007**, *23*, 421–427.
46. Slotkin, T.A.; Seidler, F.J. Developmental exposure to terbutaline and chlorpyrifos, separately or sequentially, elicits presynaptic serotonergic hyperactivity in juvenile and adolescent rats. *Brain Res. Bull.* **2007**, *73*, 301–309.
47. Aldridge, J.E.; Meyer, A.; Seidler, F.J.; Slotkin, T.A. Alterations in central nervous system serotonergic and dopaminergic synaptic activity in adulthood after prenatal or neonatal chlorpyrifos exposure. *Environ. Health Perspect.* **2005**, *113*, 1027–1031.
48. Binukumar, B.K.; Gupta, N.; Bal, A.; Gill, K.D. Protection of dichlorvos induced oxidative stress and nigrostriatal neuronal death by chronic coenzyme q10 pretreatment. *Toxicol. Appl. Pharmacol.* **2011**, *256*, 73–82.
49. Chen, X.P.; Wang, X.; Dong, J.Y. Different reaction patterns of dopamine content to prenatal exposure to chlorpyrifos in different periods. *J. Appl. Toxicol.* **2011**, *31*, 355–359.
50. Sledge, D.; Yen, J.; Morton, T.; Dishaw, L.; Petro, A.; Donerly, S.; Linney, E.; Levin, E.D. Critical duration of exposure for developmental chlorpyrifos-induced neurobehavioral toxicity. *Neurotoxicol. Teratol.* **2011**, *33*, 742–751.
51. Binukumar, B.K.; Bal, A.; Kandimalla, R.J.; Gill, K.D. Nigrostriatal neuronal death following chronic dichlorvos exposure: Crosstalk between mitochondrial impairments, alpha synuclein aggregation, oxidative damage and behavioral changes. *Mol. Brain* **2010**, *3*, 35.
52. Eells, J.B.; Brown, T. Repeated developmental exposure to chlorpyrifos and methyl parathion causes persistent alterations in nicotinic acetylcholine subunit mRNA expression with chlorpyrifos altering dopamine metabolite levels. *Neurotoxicol. Teratol.* **2009**, *31*, 98–103.
53. Damodaran, T.V.; Patel, A.G.; Greenfield, S.T.; Dressman, H.K.; Lin, S.M.; Abou-Donia, M.B. Gene expression profiles of the rat brain both immediately and 3 months following acute sarin exposure. *Biochem. Pharmacol.* **2006**, *71*, 497–520.
54. Padilla, S.; Marshall, R.S.; Hunter, D.L.; Oxendine, S.; Moser, V.C.; Southerland, S.B.; Mailman, R.B. Neurochemical effects of chronic dietary and repeated high-level acute exposure to chlorpyrifos in rats. *Toxicol. Sci.* **2005**, *88*, 161–171.
55. Carbone, S.; Samaniego, Y.A.; Cutrera, R.; Reynoso, R.; Cardoso, N.; Scacchi, P.; Moguilevsky, J.A.; Ponzo, O.J. Different effects by sex on hypothalamic-pituitary axis of prepubertal offspring rats produced by *in utero* and lactational exposure to di-(2-ethylhexyl) phthalate (dehp). *Neurotoxicology* **2012**, *33*, 78–84.

56. Carbone, S.; Szwarcfarb, B.; Ponzo, O.; Reynoso, R.; Cardoso, N.; Deguiz, L.; Moguilevsky, J.A.; Scacchi, P. Impact of gestational and lactational phthalate exposure on hypothalamic content of amino acid neurotransmitters and FSH secretion in peripubertal male rats. *Neurotoxicology* **2010**, *31*, 747–751.
57. Ishido, M.; Masuo, Y.; Sayato-Suzuki, J.; Oka, S.; Niki, E.; Morita, M. Dicyclohexylphthalate causes hyperactivity in the rat concomitantly with impairment of tyrosine hydroxylase immunoreactivity. *J. Neurochem.* **2004**, *91*, 69–76.
58. Masuo, Y.; Ishido, M.; Morita, M.; Oka, S. Effects of neonatal treatment with 6-hydroxydopamine and endocrine disruptors on motor activity and gene expression in rats. *Neural. Plast.* **2004**, *11*, 59–76.
59. Masuo, Y.; Morita, M.; Oka, S.; Ishido, M. Motor hyperactivity caused by a deficit in dopaminergic neurons and the effects of endocrine disruptors: A study inspired by the physiological roles of PACAP in the brain. *Regul. Pept.* **2004**, *123*, 225–234.

© 2013 by the authors; licensee MDPI, Basel, Switzerland. This article is an open access article distributed under the terms and conditions of the Creative Commons Attribution license (<http://creativecommons.org/licenses/by/3.0/>).
